# Supplementary material
Source: HighWire-hosted journal article supplement (https://jitc.bmj.com/content/9/2/e002100)
Supplement: inline-supplementary-material-1 [file inline-supplementary-material-1.xlsx]

## Sheet: Table S2. Compartments
Name	Capacity	CapacityUnits	Notes
V_C	5	liter	Central compartment (C) (estimated)
V_P	60	liter	Peripheral compartment (P) (estimated)
V_T	see Rules	milliliter	Tumor compartment (T) (estimated)
V_LN	1112.65	millimeter^3	Lymph node (LN) compartment volume Volume of lumped tumor-draining lymph nodes calculated based on number of LNs (estimated) and average LN diameter (Schmidt 2007, PMID: 17724531)
V_e	4e-16	litre	APC endosomal comparment calculated based on the volume of a single endosome (Agrawal and Linderman 1996, PMID: 8944895) and the number of endosomes per cell (Agrawal and Linderman 1996, PMID: 8944895)
A_e	15	micrometer^2	APC endosomal surface comparment calculated based on the surface area of a single endosome (Agrawal and Linderman 1996, PMID: 8944895) and the number of endosomes per cell (Agrawal and Linderman 1996, PMID: 8944895)
A_s	900	micrometer^2	APC surface comparment (Agrawal and Linderman 1996, PMID: 8944895)
syn_T_C1	37.8	micrometer^2	synapse comparment between T and C1 (Jansson 2005, PMID: 16034096)
syn_T_APC	37.8	micrometer^2	synapse comparment between T and APC (Jansson 2005, PMID: 16034096)
V_1	15.8	liter	Central compartment (V1) for nab-paclitaxel PK
V_2	1650	liter	Peripheral compartment (V2) for nab-paclitaxel PK
V_3	75.4	liter	Peripheral compartment (V3) for nab-paclitaxel PK

## Sheet: Table S3. Species
Name	InitialAmount	InitialAmountUnits	Parent	Notes
nT0	3706.9	cell	V_C	Number of naive T0 cells in the central compartment
T0	0	cell	V_C	Number of T0 cells in the central compartment
nT1	2274.77	cell	V_C	Number of naive T1 cells in the central compartment
T1	0	cell	V_C	Number of T1 cells in the central compartment
nivo	0	molarity	V_C	Concentration of nivo in central compartment
atezo	0	molarity	V_C	Concentration of atezo in central compartment
ipi	0	molarity	V_C	Concentration of ipi in central compartment
ENT	0	molarity	V_C	Concentration of ENT in central compartment
ENT_Buccal	0	molarity	V_C	Concentration of ENT from buccal absorption
ENT_GI	0	molarity	V_C	Concentration of ENT from GI absorption
Dose2	0	molarity	V_C	Fraction of an oral drug dose for GI absorption
Th	0	cell	V_C	Number of Th cells in the central compartment
nT0	185345	cell	V_P	Number of naive T0 cells in the peripheral compartment
T0	0	cell	V_P	Number of T0 cells in the peripheral compartment
nT1	113739	cell	V_P	Number of naive T1 cells in the peripheral compartment
T1	0	cell	V_P	Number of T1 cells in the peripheral compartment
nivo	0	molarity	V_P	Concentration of nivo in peripheral compartment
atezo	0	molarity	V_P	Concentration of atezo in peripheral compartment
ipi	0	molarity	V_P	Concentration of ipi in peripheral compartment
Treg_CTLA4	0	molecule	V_P	Number of free CTLA4 molecules on Treg in Peripheral compartment
Treg_CTLA4_ipi	0	molecule	V_P	Number of CTLA4-ipilimumab complex on Treg in Peripheral compartment
Treg_CTLA4_ipi_CTLA4	0	molecule	V_P	Number of CTLA4-ipilimumab-CTLA4 complex on Treg in Peripheral compartment
ENT	0	molarity	V_P	Concentration of ENT in peripheral compartment
Th	0	cell	V_P	Number of Th cells in the peripheral compartment
C_x	0	cell	V_T	Dead cancer cells in the tumour compartment
T1_exh	0	cell	V_T	Exhausted CD8 effector T cells
Th_exh	0	cell	V_T	Exhausted CD4 effector T cells
C1	4700000	cell	V_T	Number of cancer cells in tumour
C2	0	cell	V_T	Number of cancer cells in tumour
nT0	0	cell	V_T	Number of naive T0 cells in the tumor compartment
T0	0	cell	V_T	Number of T0 cells in the tumor compartment
nT1	0	cell	V_T	Number of naive T1 cells in the tumor compartment
T1	0	cell	V_T	Number of T1 cells in the tumor compartment
APC	0	cell	V_T	Number of naive antigen presenting cells in the tumour
mAPC	0	cell	V_T	Number of mature antigen presenting cells in the tumour
c	0	molarity	V_T	Concentration of maturation cytokines in the tumour
P0	1e-18	molarity	V_T	Concentration of free antigen (P0) in the LN compartment
P1	1e-18	molarity	V_T	Concentration of free antigen (P1) in the LN compartment
nivo	0	molarity	V_T	Concentration of nivo in tumour compartment
atezo	0	molarity	V_T	Concentration of atezo in tumour compartment
ipi	0	molarity	V_T	Concentration of ipi in tumour compartment
Treg_CTLA4	0	molecule	V_T	Number of free CTLA4 molecules on Treg in Tumour compartment
Treg_CTLA4_ipi	0	molecule	V_T	Number of CTLA4-ipilimumab complex on Treg in Tumour compartment
Treg_CTLA4_ipi_CTLA4	0	molecule	V_T	Number of CTLA4-ipilimumab-CTLA4 complex on Treg in Tumour compartment
MDSC	0	cell	V_T	Number of MDSCs in the tumour compartment
CCL2	0	molarity	V_T	Concentration of CCL2 in the tumor compartment
NO	0	molarity	V_T	Concentration of NO in the tumor compartment
ArgI	0	mU	V_T	Concentration of Arg I in the tumor compartment
ENT	0	molarity	V_T	Concentration of ENT in tumour compartment
NabP	0	molarity	V_T	Nab-paclitaxel concentration in tumour
K	27000	cell	V_T	Maximal tumor capacity (Desai 2006, PMID: 16489089)
c_vas	0	picogram/milliliter	V_T	Angiogenic factors
Th	0	cell	V_T	Number of Th cells in the tumor compartment
TGF	0	molarity	V_T	TGFb in the tumor comparment
IFNg	0	molarity	V_T	IFNg in the tumor comparment
nT0	155.69	cell	V_LN	Number of naive T0 cells in the lymph node
aT0	0	cell	V_LN	Number of activated T0 cells in the lymph node
T0	0	cell	V_LN	Number of T0 cells in the lymph node compartment
IL2	1e-18	molarity	V_LN	Concentration of IL2 in the lymph node compartment
nT1	113.739	cell	V_LN	Number of naive T1 cells in the lymph node
aT1	0	cell	V_LN	Number of activated T1 cells in the lymph node
T1	0	cell	V_LN	Number of T1 cells in the lymph node compartment
APC	0	cell	V_LN	Number of naive antigen presenting cells in the lymph node
mAPC	0	cell	V_LN	Number of mature antigen presenting cells in the lymph node
nivo	0	molarity	V_LN	Concentration of nivo in lymph node compartment
atezo	0	molarity	V_LN	Concentration of atezo in lymph node compartment
ipi	0	molarity	V_LN	Concentration of ipi in lymph node compartment
ENT	0	molarity	V_LN	Concentration of ENT in lymph node compartment
aTh	0	cell	V_LN	Number of activated Th cells in the lymph node
Th	0	cell	V_LN	Number of Th cells in the lymph node compartment
P0	1e-18	molarity	V_e	Concentration of antigen P0 in the APC endosomes
p0	1e-18	molarity	V_e	Concentration of epitope P0 in the APC endosomes
P1	1e-18	molarity	V_e	Concentration of antigen P1 in the APC endosomes
p1	1e-18	molarity	V_e	Concentration of epitope P1 in the APC endosomes
M1	2185.79	molecule/micrometer^2	A_e	Amount of MHC per area on the endosomal surface
M1p0	1e-06	molecule/micrometer^2	A_e	Antigen-MHC complex
M1p1	1e-06	molecule/micrometer^2	A_e	Antigen-MHC complex
M1	1e-06	molecule/micrometer^2	A_s	Amount of MHC per area on the cell surface
M1p0	1e-06	molecule/micrometer^2	A_s	Antigen-MHC complex
M1p1	1e-06	molecule/micrometer^2	A_s	Antigen-MHC complex
PDL1_total	0	molecule/micrometer^2	syn_T_C1	concentration of bound and unbound PDL1 molecules
PDL2_total	0	molecule/micrometer^2	syn_T_C1	concentration of bound and unbound PDL2 molecules
PD1_PDL1	0	molecule/micrometer^2	syn_T_C1	concentration of PD1-PDL1 complex
PD1_PDL2	0	molecule/micrometer^2	syn_T_C1	concentration of PD1-PDL2 complex
PD1	0	molecule/micrometer^2	syn_T_C1	concentration of PD1 in synapse
PDL1	0	molecule/micrometer^2	syn_T_C1	concentration of PDL1 in synapse
PDL2	0	molecule/micrometer^2	syn_T_C1	concentration of PDL2 in synapse
PD1_nivo	0	molecule/micrometer^2	syn_T_C1	concentration of PD1-nivolumab complex
PD1_nivo_PD1	0	molecule/micrometer^2	syn_T_C1	concentration of PD1-nivolumab-PD1 complex
PDL1_atezo	0	molecule/micrometer^2	syn_T_C1	concentration of PDL1-atezolizumab complex
PDL1_atezo_PDL1	0	molecule/micrometer^2	syn_T_C1	concentration of PDL1-atezolizumab-PDL1 complex
TPDL1	0	molecule/micrometer^2	syn_T_C1	concentration of PDL1 in synapse of T cell
TPDL1_atezo	0	molecule/micrometer^2	syn_T_C1	concentration of TPDL1-atezolizumab complex
TPDL1_atezo_TPDL1	0	molecule/micrometer^2	syn_T_C1	concentration of TPDL1-atezolizumab-TPDL1 complex
CD28_CD80	0	molecule/micrometer^2	syn_T_C1	concentration of CD28-CD80 complex
CD28_CD80_CD28	0	molecule/micrometer^2	syn_T_C1	concentration of CD28-CD80-CD28 complex
CD28_CD86	0	molecule/micrometer^2	syn_T_C1	concentration of CD28-CD86 complex
CD80_CTLA4	0	molecule/micrometer^2	syn_T_C1	concentration of CD80-CTLA4 complex
CD80_CTLA4_CD80	0	molecule/micrometer^2	syn_T_C1	concentration of CD80-CTLA4-CD80 complex
CTLA4_CD80_CTLA4	0	molecule/micrometer^2	syn_T_C1	concentration of CTLA4-CD80-CTLA4 complex
CD80_CTLA4_CD80_CTLA4	0	molecule/micrometer^2	syn_T_C1	concentration of CD80-CTLA4-CD80-CTLA4 complex
CD86_CTLA4	0	molecule/micrometer^2	syn_T_C1	concentration of CD86-CTLA4 complex
CD86_CTLA4_CD86	0	molecule/micrometer^2	syn_T_C1	concentration of CD86-CTLA4-CD86 complex
TPDL1_CD80	0	molecule/micrometer^2	syn_T_C1	concentration of TPDL1-CD80 complex
TPDL1_CD80_TPDL1	0	molecule/micrometer^2	syn_T_C1	concentration of TPDL1-CD80-TPDL1 complex
CD28	0	molecule/micrometer^2	syn_T_C1	concentration of CD28 in synapse
CTLA4	0	molecule/micrometer^2	syn_T_C1	concentration of CTLA4 in synapse
CD80	0	molecule/micrometer^2	syn_T_C1	concentration of CD80 in synapse
CD86	0	molecule/micrometer^2	syn_T_C1	concentration of CD86 in synapse
CTLA4_ipi	0	molecule/micrometer^2	syn_T_C1	concentration of CTLA4-ipilimumab complex
CTLA4_ipi_CTLA4	0	molecule/micrometer^2	syn_T_C1	concentration of CTLA4-ipilimumab-CTLA4 complex
PDL1_total	0	molecule/micrometer^2	syn_T_APC	concentration of bound and unbound PDL1 molecules
PDL2_total	0	molecule/micrometer^2	syn_T_APC	concentration of bound and unbound PDL2 molecules
PD1_PDL1	0	molecule/micrometer^2	syn_T_APC	concentration of PD1-PDL1 complex
PD1_PDL2	0	molecule/micrometer^2	syn_T_APC	concentration of PD1-PDL2 complex
PD1	0	molecule/micrometer^2	syn_T_APC	concentration of PD1 in synapse
PDL1	0	molecule/micrometer^2	syn_T_APC	concentration of PDL1 in synapse
PDL2	0	molecule/micrometer^2	syn_T_APC	concentration of PDL2 in synapse
PD1_nivo	0	molecule/micrometer^2	syn_T_APC	concentration of PD1-nivolumab complex
PD1_nivo_PD1	0	molecule/micrometer^2	syn_T_APC	concentration of PD1-nivolumab-PD1 complex
PDL1_atezo	0	molecule/micrometer^2	syn_T_APC	concentration of PDL1-atezolizumab complex
PDL1_atezo_PDL1	0	molecule/micrometer^2	syn_T_APC	concentration of PDL1-atezolizumab-PDL1 complex
TPDL1	0	molecule/micrometer^2	syn_T_APC	concentration of PDL1 in synapse of T cell
TPDL1_atezo	0	molecule/micrometer^2	syn_T_APC	concentration of TPDL1-atezolizumab complex
TPDL1_atezo_TPDL1	0	molecule/micrometer^2	syn_T_APC	concentration of TPDL1-atezolizumab-TPDL1 complex
CD28_CD80	0	molecule/micrometer^2	syn_T_APC	concentration of CD28-CD80 complex
CD28_CD80_CD28	0	molecule/micrometer^2	syn_T_APC	concentration of CD28-CD80-CD28 complex
CD28_CD86	0	molecule/micrometer^2	syn_T_APC	concentration of CD28-CD86 complex
CD80_CTLA4	0	molecule/micrometer^2	syn_T_APC	concentration of CD80-CTLA4 complex
CD80_CTLA4_CD80	0	molecule/micrometer^2	syn_T_APC	concentration of CD80-CTLA4-CD80 complex
CTLA4_CD80_CTLA4	0	molecule/micrometer^2	syn_T_APC	concentration of CTLA4-CD80-CTLA4 complex
CD80_CTLA4_CD80_CTLA4	0	molecule/micrometer^2	syn_T_APC	concentration of CD80-CTLA4-CD80-CTLA4 complex
CD86_CTLA4	0	molecule/micrometer^2	syn_T_APC	concentration of CD86-CTLA4 complex
CD86_CTLA4_CD86	0	molecule/micrometer^2	syn_T_APC	concentration of CD86-CTLA4-CD86 complex
TPDL1_CD80	0	molecule/micrometer^2	syn_T_APC	concentration of TPDL1-CD80 complex
TPDL1_CD80_TPDL1	0	molecule/micrometer^2	syn_T_APC	concentration of TPDL1-CD80-TPDL1 complex
CD28	0	molecule/micrometer^2	syn_T_APC	concentration of CD28 in synapse
CTLA4	0	molecule/micrometer^2	syn_T_APC	concentration of CTLA4 in synapse
CD80	0	molecule/micrometer^2	syn_T_APC	concentration of CD80 in synapse
CD86	0	molecule/micrometer^2	syn_T_APC	concentration of CD86 in synapse
CTLA4_ipi	0	molecule/micrometer^2	syn_T_APC	concentration of CTLA4-ipilimumab complex
CTLA4_ipi_CTLA4	0	molecule/micrometer^2	syn_T_APC	concentration of CTLA4-ipilimumab-CTLA4 complex
NabP	0	nanogram/milliliter	V_1	Nab-paclitaxel in the central compartment V1
NabP	0	nanogram/milliliter	V_2	Nab-paclitaxel in the peripheral compartment V2
NabP	0	nanogram/milliliter	V_3	Nab-paclitaxel in the peripheral compartment V3

## Sheet: Table S4. Parameters
Name	Value	ValueUnits	Notes
k_cell_clear	0.1	1/day	Rate of dead cell clearance from tumour compartment (estimated)
cell	1	cell	unit parameter for calculation
day	1	day	unit parameter for calculation
vol_cell	2572.44	micrometer^3/cell	Average volume of cancer cell Volume of a cancer cell calculated based on cancer cell diameter (Abramczyk 2015, PMID: 25730442)
vol_Tcell	175.016	micrometer^3/cell	Average volume of T cells Volume of a T cell calculated based on the average T cell diameter (Chapman 1981, PMID: 6975780)
Ve_T	0.37	dimensionless	Void fraction of the tumor (Finley 2012, PMID: 22547351)
C_total	0	cell	Total number of cancer cells
T_total	0	cell	Total number of activated T cells in tumor
T_total_LN	0	cell	Total number of activated T cells in TDLNs
R_Tcell	1	cell/day	Rate of cancer cell death
Tregs_	0	cell	Total number of activated T cells in TDLNs
H_APC	0.5	dimensionless	Hill function of mAPC for self-antigen-specific Treg activation
H_mAPC	1	dimensionless	Hill function of mAPC for CD8 T cell activation
H_APCh	1	dimensionless	Hill function of mAPC for neoantigen-specific helper T cell activation
H_PD1_C1	0.9	dimensionless	Hill function of PDL1 on tumor cells for T cell exhaustion
H_PD1_APC	0.9	dimensionless	Hill function of PDL1 on APC for T cell exhaustion
H_CD28_C1	0.1	dimensionless	Hill function of CD28 on tumor cells
H_CD28_APC	0.1	dimensionless	Hill function of CD28 on APCs for T cell activation
H_MDSC_C1	1	dimensionless	Hill function of MDSC on T cell inhibition
H_ENT_C1	1	dimensionless	Hill function of entinostat on MDSC inhibition
k_C1_growth	0.0087	1/day	Cancer cell growth rate (Ryu 2014, PMID: 24895040; Desai, PMID: 16489089)
C_max	27000	cell	Cancer cell capacity (Desai 2006, PMID: 16489089)
k_C1_death	0.0001	1/day	Cancer cell death rate from innate immune cells (Palsson 2013, PMID: 24074340)
k_C1_therapy	0	1/day	Rate of C1 killing by therapy (see Rules)
initial_tumour_diameter	2.5	centimeter	Pre-treatment tumor diameter
k_C2_growth	0.0087	1/day	Cancer cell growth rate (Ryu 2014, PMID: 24895040; Desai, PMID: 16489089)
k_C2_death	0.0001	1/day	Cancer cell death rate from innate immune cells (Palsson 2013, PMID: 24074340)
k_C2_therapy	0	1/day	Rate of C2 killing by therapy (see Rules)
div_T0	1160000	dimensionless	T Cell Diversity (Robins 2009, PMID: 19706884)
n_T0_clones	63	dimensionless	Number of T cell clones (estimated)
q_T0_LN_in	0.1	1/day	Rate of naive T cell transport into the LN calculated based on the steady-state naive T cell level in healthy individuals (Autissier 2010, PMID: 20099249)
q_T0_LN_out	24	1/day	Rate of activated T cell transport out of the LN (De Boer and Perelson 1995, PMID: 7475092)
q_nT0_LN_out	2.88	1/day	Rate of naive T cell transport out of the LN (Mandl 2012, PMID: 23071319)
k_T0_act	5	1/day	T0 activation rate (De Boer and Perelson 1995, PMID: 7475092; Robertson-Tessi 2012, PMID: 22051568)
k_T0_pro	1	1/day	T0 proliferation rate (Marchingo 2014, PMID: 25430770)
k_T0_death	0.01	1/day	T0 death rate (De Boer and Perelson 1995, PMID: 7475092)
q_T0_P_in	2.436	1/minute	rate of T0 transport into the peripheral compartment calculated based on T cell transmigration rate (Zhu 1996, PMID: 8706023) and T cell adhesion density (Zhu 1996, PMID: 8706023)
q_T0_P_out	24	1/day	rate of T0 transport out of the peripheral compartment (De Boer and Perelson 1995, PMID: 7475092)
q_T0_T_in	5.8e-05	1/(centimeter^3*minute)	rate of T0 transport into the tumor compartment calculated based on T cell transmigration rate (Zhu 1996, PMID: 8706023) and T cell adhesion density (Zhu 1996, PMID: 8706023)
q_nT0_P_in	0.1764	1/minute	rate of nT0 transport into the peripheral compartment calculated based on T cell transmigration rate (Zhu 1996, PMID: 8706023) and T cell adhesion density (Zhu 1996, PMID: 8706023)
q_nT0_P_out	5.1	1/day	rate of nT0 transport out of the peripheral compartment calculated based on steady-state naive T cell density in healthy individuals (Autissier 2010, PMID: 20099249)
Q_nT0_thym	70000000	cell/day	Thymic output of nT0 (Bains 2009, PMID: 19179300; Yeh 2017, PMID: 28912973)
k_nT0_pro	320000000	cell/day	rate of nT0 proliferation (Braber 2012, PMID: 22365666)
K_nT0_pro	1000000000	cell	half-maximal peripheral proliferation of of nT0 (Braber 2012, PMID: 22365666)
k_nT0_death	0.002	1/day	rate of nT0 death (Braber 2012, PMID: 22365666)
k_IL2_deg	0.2	1/minute	rate of IL2 degradation (Lotze 1985, PMID: 3871099)
k_IL2_cons	6e-06	nanomole/cell/hour	rate of IL2 consumption by T cells (Lotze 1985, PMID: 3871099)
k_IL2_sec	3e-05	nanomole/cell/hour	rate of IL2 secretion from T cells (Han 2012, PMID: 22160692; Thurley 2015, PMID: 25923703; Liu 2001)
IL2_50	0.32	nanomolarity	T cell activation half-maximal IL2 concentration (Marchingo 2014, PMID: 25430770)
IL2_50_Treg	0.32	nanomolarity	Treg activation half-maximal IL2 concentration (Wang and Smith 1987, PMID: 3116143)
N0	2	dimensionless	numer of activated T cell generation by TCR signaling only(Marchingo 2014, PMID: 25430770)
N_costim	3	dimensionless	numer of activated T cell generation by co-stimulatory signaling only (Marchingo 2014, PMID: 25430770)
N_IL2_CD8	11	dimensionless	maximum number of activated T cell generations due to IL2 (Marchingo 2014, PMID: 25430770)
N_IL2_CD4	8	dimensionless	maximum number of activated T cell generations due to IL2 (Marchingo 2014, PMID: 25430770)
k_Treg	0.1	1/day	Rate of T cell death by Tregs (estimated)
H_P0	1	dimensionless	Hill function of tumor antigenP0
N_aT	1	dimensionless	Number of Activated CD8+ T Cell Generations
N_aT0	1	dimensionless	Number of Activated Treg Generations
div_T1	1110000	dimensionless	T Cell Diversity (Robins 2009, PMID: 19706884)
n_T1_clones	63	dimensionless	Number of T cell clones (Li 2016, PMID: 27240091; Narang 2019, PMID: 30832597)
q_T1_LN_in	0.076	1/day	Rate of naive T cell transport into the LN calculated based on the steady-state naive T cell level in healthy individuals (Autissier 2010, PMID: 20099249)
q_T1_LN_out	24	1/day	Rate of activated T cell transport out of the LN (De Boer and Perelson 1995, PMID: 7475092)
q_nT1_LN_out	1.8	1/day	Rate of naive T cell transport out of the LN (Mandl 2012, PMID: 23071319)
k_T1_act	23	1/day	T1 activation rate (De Boer and Perelson 1995, PMID: 7475092; Robertson-Tessi 2012, PMID: 22051568)
k_T1_pro	1	1/day	T1 proliferation rate (Marchingo 2014, PMID: 25430770)
k_T1_death	0.01	1/day	T1 death rate (De Boer and Perelson 1995, PMID: 7475092)
q_T1_P_in	2.436	1/minute	rate of T1 transport into the peripheral compartment calculated based on T cell transmigration rate (Zhu 1996, PMID: 8706023) and T cell adhesion density (Zhu 1996, PMID: 8706023)
q_T1_P_out	24	1/day	rate of T1 transport out of the peripheral compartment (De Boer and Perelson 1995, PMID: 7475092)
q_T1_T_in	5.8e-05	1/(centimeter^3*minute)	rate of T1 transport into the tumor compartment calculated based on T cell transmigration rate (Zhu 1996, PMID: 8706023) and T cell adhesion density (Zhu 1996, PMID: 8706023)
q_nT1_P_in	0.1764	1/minute	rate of nT1 transport into the peripheral compartment calculated based on T cell transmigration rate (Zhu 1996, PMID: 8706023) and T cell adhesion density (Zhu 1996, PMID: 8706023)
q_nT1_P_out	5.1	1/day	rate of nT1 transport out of the peripheral compartment calculated based on steady-state naive T cell density in healthy individuals (Autissier 2010, PMID: 20099249)
Q_nT1_thym	35000000	cell/day	Thymic output of nT1 (Bains 2009, PMID: 19179300; Ye 2002, PMID: 11994448)
k_nT1_pro	320000000	cell/day	rate of nT1 proliferation (Braber 2012, PMID: 22365666)
K_nT1_pro	1000000000	cell	half-maximal peripheral proliferation of of nT1 (Braber 2012, PMID: 22365666)
k_nT1_death	0.002	1/day	rate of nT1 death (Braber 2012, PMID: 22365666)
k_T1	0.1	1/day	Rate of T cell exhaustion by cancer cells (estimated)
k_C_T1	0.9	1/day	Rate of cancer cell death by T cells (Robertson-Tessi 2012, PMID: 22051568)
H_P1	1	dimensionless	Hill function of tumor antigen P1
k_APC_mat	1.5	1/day	Maximum rate of APC maturation (Chen 2014, PMID: 25184733)
k_APC_mig	4	1/day	Rate of APC migration (Russo Halin 2016, PMID: 26876174)
k_APC_death	0.01	1/day	Rate of APC death (Marino and Kirschner 2004, PMID: 15038983)
k_mAPC_death	0.02	1/day	Rate of mAPC death(Marino and Kirschner 2004, PMID: 15038983)
APC0_T	400000	cell/milliliter	Steady state density of CD103+ APCs in the tumor, calculated to fit basal APC equal to 26000/cm^3 from (Lavin 2017, PMID: 28475900)
APC0_LN	1200000	cell/milliliter	Steady state density of all APC subtypes in the LN (Catron 2004, PMID: 15357945)- divided by 10 to only take CD103+ based on (Lavin 2017, PMID: 28475900)
k_c	2	1/day	Cytokine rate constant (Chen 2014, PMID: 25184733)
c0	1e-09	molarity	Baseline cytokine concentration (Chen 2014, PMID: 25184733)
c50	1e-09	molarity	Cytokine concentration for half-maximal APC maturation (Chen 2014, PMID: 25184733)
DAMPs	1.34e-14	mole/cell	Concentration of cytokines released per dying cancer cell (Milo 2013, PMID: 24114984, Ponomarenko 2016, PMID: 27298622)
n_sites_APC	10	dimensionless	Maxium number of T Cells an APC can interact with (De Boer and Perelson 1995, PMID: 7475092)
kin	14.4	1/day	Rate of MHC internalization (Chen 2014, PMID: 25184733)
kout	28.8	1/day	Rate of MHC externalization (Chen 2014, PMID: 25184733)
k_P0_up	14.4	1/day/cell	Rate of antigen uptake by APCs (Chen 2014, PMID: 25184733)
k_xP0_deg	2	1/day	Rate of extracellular antigen degradation (Palsson 2013, PMID: 24074340)
k_P0_deg	17.28	1/day	Rate of endosomal antigen degradation (Chen 2014, PMID: 25184733)
k_p0_deg	144	1/day	Rate of endosomal epitope degradation (Chen 2014, PMID: 25184733)
k_P0_on	144000	1/day/molarity	Rate of antigen-MHC binding (Agrawal and Linderman 1996, PMID: 8944895)
k_P0_d1	1e-07	molarity	Antigen-MHC kd (Stone 2015, PMID: 25618219)
p0_50	2.6455e-05	molecule/micrometer^2	calculated based on the number of molecules for half-maximal T cell activation (Kimachi 1997, PMID: 9464819) and synapse surface area
P0_C1	5.4e-13	mole/cell	Concentration of P0 in C1 (estimated by 2.7e6 proteins/um^3 in a cancer cell (Milo 2013, PMID: 24114984) * cancer cell volume / Avogadro constant)
P0_C2	5.4e-13	mole/cell	Concentration of P0 in C2 (estimated by 2.7e6 proteins/um^3 in a cancer cell (Milo 2013, PMID: 24114984) * cancer cell volume / Avogadro constant)
A_syn	37.8	micrometer^2	Surface area of the synapse (Jansson 2005, PMID: 16034096)
A_Tcell	151.31	micrometer^2	Surface area of the T cell calculated based on the average T cell diameter (Chapman 1981, PMID: 6975780)
A_cell	907.92	micrometer^2	Surface area of the Cancer cell calculated based on the average Cancer cell diameter (Abramczyk 2015, PMID: 25730442)
A_APC	900	micrometer^2	Surface area of the APC (Agrawal and Linderman 1996, PMID: 8944895)
k_M1p0_TCR_on	1	1/(second*molecule/micrometer^2)	Rate of TCR binding to MHC-peptide complex (Lever 2014, PMID: 25145757)
k_M1p0_TCR_off	1	1/second	Rate of TCR unbinding from MHC-peptide complex (Lever 2014, PMID: 25145757)
k_M1p0_TCR_p	1	1/second	Rate of MHC-peptide-TCR complex modification (Lever 2014, PMID: 25145757)
phi_M1p0_TCR	0.09	1/second	Rate of MHC-peptide-TCR complex with maximal modification that leads to non-signaling(Lever 2014, PMID: 25145757)
N_M1p0_TCR	10	dimensionless	Number of modifcation steps for MHC-peptide-TCR complex (Lever 2014, PMID: 25145757)
TCR_p0_tot	103.813	molecule/micrometer^2	Total number of TCR molecules per naive T cell calculated based on the number of molecules for TCR (Lever 2014, PMID: 25145757) and T cell surface area
pTCR_p0_MHC_tot	0	molecule/micrometer^2	Total number of MHC-p0-TCR complexes of all different activation levels (see Rules)
k_P1_up	14.4	1/day/cell	Rate of antigen uptake by APCs (Chen 2014, PMID: 25184733)
k_xP1_deg	2	1/day	Rate of extracellular antigen degradation (Palsson 2013, PMID: 24074340)
k_P1_deg	17.28	1/day	Rate of endosomal antigen degradation (Chen 2014, PMID: 25184733)
k_p1_deg	144	1/day	Rate of endosomal epitope degradation (Chen 2014, PMID: 25184733)
k_P1_on	144000	1/day/molarity	Rate of antigen-MHC binding (Agrawal and Linderman 1996, PMID: 8944895)
k_P1_d1	1e-08	molarity	Antigen-MHC kd (Stone 2015, PMID: 25618219)
p1_50	2.6455e-05	molecule/micrometer^2	calculated based on the number of molecules for half-maximal T cell activation (Kimachi 1997, PMID: 9464819) and synapse surface area
P1_C1	5.4e-13	mole/cell	Concentration of P1 in C1 (estimated by 2.7e6 proteins/um^3 in a cancer cell (Milo 2013, PMID: 24114984) * cancer cell volume / Avogadro constant)
P1_C2	5.4e-13	mole/cell	Concentration of P1 in C2 (estimated by 2.7e6 proteins/um^3 in a cancer cell (Milo 2013, PMID: 24114984) * cancer cell volume / Avogadro constant)
k_M1p1_TCR_on	1	1/(second*molecule/micrometer^2)	Rate of TCR binding to MHC-peptide complex (Lever 2014, PMID: 25145757)
k_M1p1_TCR_off	1	1/second	Rate of TCR unbinding from MHC-peptide complex (Lever 2014, PMID: 25145757)
k_M1p1_TCR_p	1	1/second	Rate of MHC-peptide-TCR complex modification (Lever 2014, PMID: 25145757)
phi_M1p1_TCR	0.09	1/second	Rate of MHC-peptide-TCR complex with maximal modification that leads to non-signaling(Lever 2014, PMID: 25145757)
N_M1p1_TCR	10	dimensionless	Number of modifcation steps for MHC-peptide-TCR complex (Lever 2014, PMID: 25145757)
TCR_p1_tot	103.813	molecule/micrometer^2	Total number of TCR molecules per naive T cell calculated based on the number of molecules for TCR (Lever 2014, PMID: 25145757) and T cell surface area
pTCR_p1_MHC_tot	0	molecule/micrometer^2	Total number of MHC-p1-TCR complexes of all different activation levels (see Rules)
kon_PD1_PDL1	0.0583333	1/(micromolarity*nanometer*second)	kon of PD1-PDL1 binding kon for PD1-PDL1 (Cheng 2013, PMID: 23417675)
q_P_nivo	8.8e-06	liter/second	Volumetric flow rate of nivo between central and peripheral compartment
q_T_nivo	8.52e-05	milliliter/second	Volumetric flow rate of nivo between central and tumor compartment
q_LN_nivo	3.25e-06	milliliter/second	Volumetric flow rate of nivo between central and TDLN compartment
q_LD_nivo	0.0015	1/minute	Rate of lymphatic drainage of nivo from TDLN to central compartment
k_cl_nivo	0.37	liter/day	Clearance rate of nivo from central compartment
gamma_C_nivo	0.61	dimensionless	Volume fraction of interstitial space available to nivo in central compartment
gamma_P_nivo	0.0452	dimensionless	Volume fraction of interstitial space available to nivo in peripheral compartment
gamma_T_nivo	0.522	dimensionless	Volume fraction of interstitial space available to nivo in tumor compartment
gamma_LN_nivo	0.2	dimensionless	Volume fraction of interstitial space available to nivo in TDLN compartment
q_P_atezo	8.7e-06	liter/second	Volumetric flow rate of atezo between central and peripheral compartment
q_T_atezo	8.52e-06	1/second	Volumetric flow rate of atezo between central and tumor compartment
q_LN_atezo	3.25e-06	milliliter/second	Volumetric flow rate of atezo between central and TDLN compartment
q_LD_atezo	0.0015	1/minute	Rate of lymphatic drainage of atezo from TDLN to central compartment
k_cl_atezo	0.324	liter/day	Clearance rate of atezo from central compartment
gamma_C_atezo	0.61	dimensionless	Volume fraction of interstitial space available to atezo in central compartment
gamma_P_atezo	0.068	dimensionless	Volume fraction of interstitial space available to atezo in peripheral compartment
gamma_T_atezo	0.522	dimensionless	Volume fraction of interstitial space available to atezo in tumor compartment
gamma_LN_atezo	0.2	dimensionless	Volume fraction of interstitial space available to atezo in TDLN compartment
q_P_ipi	1.15e-05	liter/second	Volumetric flow rate of ipi between central and peripheral compartment
q_T_ipi	8.52e-05	milliliter/second	Volumetric flow rate of ipi between central and tumor compartment
q_LN_ipi	3.25e-06	milliliter/second	Volumetric flow rate of ipi between central and TDLN compartment
q_LD_ipi	0.0015	1/minute	Rate of lymphatic drainage of ipi from TDLN to central compartment
k_cl_ipi	0.524	liter/day	Clearance rate of ipi from central compartment
gamma_C_ipi	0.686	dimensionless	Volume fraction of interstitial space available to ipi in central compartment
gamma_P_ipi	0.0496	dimensionless	Volume fraction of interstitial space available to ipi in peripheral compartment
gamma_T_ipi	0.522	dimensionless	Volume fraction of interstitial space available to ipi in tumor compartment
gamma_LN_ipi	0.2	dimensionless	Volume fraction of interstitial space available to ipi in TDLN compartment
k_out_PDL1	50000	molecule/day	Expression rate of PDL1 on tumor cells (Mimura 2018, PMID: 29034543)
k_in_PDL1	1	1/day	Degradation rate of PDL1 on tumor cells (Hsu 2018, PMID: 30442814)
r_PDL1_IFNg	6	dimensionless	Number of folds increase of PDL1 expression by IFNg (Shin 2017, PMID: 27903500)
kon_PD1_PDL2	0.0766667	1/(micromolarity*nanometer*second)	kon of PD1-PDL2 binding (Cheng 2013, PMID: 23417675)
kon_PD1_nivo	1300000	1/(molarity*second)	kon of PD1-nivolumab binding (Wang 2014, PMID: 24872026)
kon_PDL1_atezo	430000	1/(molarity*second)	kon of PDL1-atezolizumab binding (Wang 2014, PMID: 24872026)
kon_CD28_CD80	0.133333	1/(micromolarity*nanometer*second)	kon of CD28-CD80 binding (Jansson 2005, PMID: 16034096)
kon_CD28_CD86	0.466667	1/(micromolarity*nanometer*second)	kon of CD28-CD86 binding (Jansson 2005, PMID: 16034096)
kon_CTLA4_CD80	0.733333	1/(micromolarity*nanometer*second)	kon of CTLA4-CD80 binding (Jansson 2005, PMID: 16034096)
kon_CTLA4_CD86	0.666667	1/(micromolarity*nanometer*second)	kon of CTLA4-CD86 binding (Jansson 2005, PMID: 16034096)
kon_CD80_PDL1	1.05333	1/(micromolarity*nanometer*second)	kon of CD80-PDL1 binding (Jansson 2005, PMID: 16034096)
kon_CTLA4_ipi	383000	1/(molarity*second)	kon of CTLA4-ipilimumab binding (Wang 2014, PMID: 24872026)
koff_PD1_PDL1	1.435	1/second	koff of PD1-PDL1 binding calculated based on the measured kd and kon (Cheng 2013, PMID: 23417675)
koff_PD1_PDL2	0.529	1/second	koff of PD1-PDL2 binding calculated based on the measured kd and kon (Cheng 2013, PMID: 23417675)
koff_PD1_nivo	0.00338	1/second	koff of PD1-nivolumab binding calculated based on the measured kd and kon (Wang 2014, PMID: 24872026)
koff_PDL1_atezo	0.000172	1/second	koff of PDL1-atezolizumab binding calculated based on the measured kd and kon (Wang 2014, PMID: 24872026)
koff_CD28_CD80	1.6	1/second	koff of CD28-CD80 binding calculated based on the measured kd and kon (Jansson 2005, PMID: 16034096)
koff_CD28_CD86	28	1/second	koff of CD28-CD86 binding calculated based on the measured kd and kon (Jansson 2005, PMID: 16034096)
koff_CTLA4_CD80	0.44	1/second	koff of CTLA4-CD80 binding calculated based on the measured kd and kon (Jansson 2005, PMID: 16034096)
koff_CTLA4_CD86	5.2	1/second	koff of CTLA4-CD86 binding calculated based on the measured kd and kon (Jansson 2005, PMID: 16034096)
koff_CD80_PDL1	6.004	1/second	koff of CD80-PDL1 binding calculated based on the measured kd and kon (Jansson 2005, PMID: 16034096)
koff_CTLA4_ipi	0.0069706	1/second	koff of CTLA4-ipilimumab binding calculated based on the measured kd and kon (Wang 2014, PMID: 24872026)
Chi_PD1_nivo	3.33333	1/nanometer	Antibody cross-arm binding efficiency that also includes the conversion of kon from 3D to 2D (estimated based on Wang 2014, PMID: 24872026)
Chi_PDL1_atezo	33.3333	1/nanometer	Antibody cross-arm binding efficiency that also includes the conversion of kon from 3D to 2D (Wang 2014, PMID: 24872026)
Chi_CTLA4_ipi	3.33333	1/nanometer	Antibody cross-arm binding efficiency that also includes the conversion of kon from 3D to 2D (estimated)
PD1_50	50	molecule/micrometer^2	PD1/PDL1 concentration for half-maximal T cell inactivation (estimated)
n_PD1	2	dimensionless	Hill coefficient for PD1/PDL1 half-maximal T cell inactivation (estimated)
CD28_CD8X_50	200	molecule/micrometer^2	CD28-CD80/CD28-CD86 concentration for half-maximal T cell co-estimulation (estimated)
n_CD28_CD8X	2	dimensionless	Hill coefficient for CD28-CD80/CD28-CD86 half-maximal T cell co-estimulation (estimated)
T_PD1_total	62000	molecule	concentration of PD1 on T cells (Cheng 2014, PMID: 23417675; Mkrtichyan 2012, PMID: 22837483)
T_CD28_total	184000	molecule	concentration of CD28 on T cells (Jansson 2005, PMID: 16034096)
T_CTLA4_syn	8000	molecule	concentration of CTLA4 on T cells (Jansson 2005, PMID: 16034096)
T_PDL1_total	186000	molecule	concentration of PDL1 on T cells (Cheng 2014, PMID: 23417675; Mkrtichyan 2012, PMID: 22837483)
C1_PDL1_base	166667	molecule	baseline number of PDL1 molecules per C1 cell (Cheng 2014, PMID: 23417675; Mkrtichyan 2012, PMID: 22837483; Gatalica 2014, PMID: 25392179)
r_PDL2C1	0.07	dimensionless	PDL2/PDL1 molecule ratio on C1cell (Cheng 2014, PMID: 23417675)
C1_CD80_total	40000	molecule	number of CD80 molecules per C1 cell (Jansson 2005, PMID: 16034096)
C1_CD86_total	860000	molecule	number of CD86 molecules per C1 cell (Jansson 2005, PMID: 16034096)
APC_PDL1_base	266667	molecule	baseline number of PDL1 molecules per APC cell (Cheng 2014, PMID: 23417675; Mkrtichyan 2012, PMID: 22837483; Gatalica 2014, PMID: 25392179)
r_PDL2APC	0.07	dimensionless	PDL2/PDL1 molecule ratio on APCcell (Cheng 2014, PMID: 23417675)
APC_CD80_total	40000	molecule	number of CD80 molecules per APC cell (Jansson 2005, PMID: 16034096)
APC_CD86_total	860000	molecule	number of CD86 molecules per APC cell (Jansson 2005, PMID: 16034096)
Treg_CTLA4_tot	5000	molecule	Total number of CTLA4 on Treg cells (Jansson 2005, PMID: 16034096)
Treg_CTLA4_50	1000	molecule	CTLA4 occupancy for half-maximal Treg inactivation by macrophages (estimated)
n_Treg_CTLA4	2	dimensionless	CTLA4 occupancy Hill coefficient for Treg inactivation by macrophages (estimated)
k_CTLA4_ADCC	0.1	1/day	Anti-CTLA4 ADCC (antibody-dependent cellular cytotoxicity) rate of Treg (Richards 2008, PMID: 18723496)
H_Treg_T	0	dimensionless	Hill function of Treg ADCC in tumor
H_Treg_P	0	dimensionless	Hill function of Treg ADCC in peripheral compartment
k_rec_MDSC	1.2	1/day	Rate of MDSC recruitment into the tumor (Lai 2018, PMID: 29735668; Huang 2006, PMID: 17257744)
kd_MDSC	0.015	1/day	Rate of MDSC death (Lai 2018, PMID: 29735668)
IC50_ENT_C	3.74e-07	molarity	ENT concentration for half-maximal tumor cell death (Bouchain 2002, PMID: 12593661; Lee 2001, PMID: 11221885)
k_deg_CCL2	0.06	1/hour	rate of CCL2 degradation (Tanimoto 2007, PMID: 18089573)
k_deg_NO	135	1/day	rate of NO degradation (Hakim 1996, PMID: 8953625)
k_deg_ArgI	0.173	1/day	rate of ArgI degradation (Schimke 1964, PMID: 14257612)
k_sec_CCL2	1.42e-10	nanomole/cell/day	rate of CCL2 secretion (Huang 2007, PMID: 17257744; Dutta, PMID: 29594759)
k_sec_NO	4.8e-07	nanomole/cell/day	rate of NO secretion from MDSCs (Serafini 2008, PMID: 18593947)
k_sec_ArgI	0.014	(mU*microliter)/cell/day	rate of ArgI secretion (Serafini 2008, PMID: 18593947)
IC50_ENT_NO	5.6e-10	molarity	half-maximal ENT concentration for NO inhibition (Choo 2010, PMID: 20421217)
IC50_ArgI_CTL	61.7	mU	rate of ArgI-induced T cell death (Serafini 2008, PMID: 18593947)
IC50_NO_CTL	7.5e-10	molarity	rate of NO-induced T cell death (Serafini 2008, PMID: 18593947)
EC50_CCL2_rec	5e-10	molarity	Half-maximal CCL2 level of MDSC recruitment (Ernst 1994, PMID: 8144933)
EC50_ArgI_Treg	22.1	mU	Half-maximal ArgI level of Treg expansion (estimated based on Serafini 2008, PMID: 18593947)
MDSC_max	163700	cell/milliliter	Maximal MDSC density in the tumour (Diaz-Montero 2009, PMID: 18446337)
IC50_ENT_CCL2	1.2e-09	molarity	half-maximal ENT concentration for CCL2 inhibition (Choo 2013, PMID: 24241152)
k_brec_MDSC	0.0021	1/day	Baseline rate of MDSC migration into the tumor(Huang 2006, PMID: 17257744)
IC50_ENT_ArgI	5e-07	molarity	half-maximal ENT concentration for Arg I inhibition (Orillian 2017, PMID: 28698201)
k_a1_ENT	1.9	1/hour	Rate of buccal absorption of ENT into central compartment
k_a2_ENT	2.5	1/hour	Rate of GI absorption of ENT into central compartment
k_cln_ENT	0.000122208	mole/(liter*hour)	Non-linear clearance rate of ENT from central compartment
Kc_ENT	9.37811e-06	mole/liter	Concentration of ENT in central compartment at 50% k_cln
lagP	3.6472	hour	Lag time of ENT absorption into central compartment
durP	0.1797	hour	Duration of zero-order absorption of ENT into central compartment
k_dose2	0.0138	1/hour	Rate of GI absorption of ENT into buccal compartment
q_P_ENT	320	milliliter/second	Volumetric flow rate of ENT between central and peripheral compartment
q_T_ENT	3200	milliliter/second	Volumetric flow rate of ENT between central and tumor compartment
q_LN_ENT	320	milliliter/second	Volumetric flow rate of ENT between central and TDLN compartment
q_LD_ENT	0.0015	1/minute	Rate of lymphatic drainage of ENT from TDLN to central compartment
k_cl_ENT	0.152	1/hour	Clearance rate of ENT from central compartment
gamma_C_ENT	0.55	dimensionless	Volume fraction of interstitial space available to ENT in central compartment
gamma_P_ENT	0.062	dimensionless	Volume fraction of interstitial space available to ENT in peripheral compartment
gamma_T_ENT	0.611	dimensionless	Volume fraction of interstitial space available to ENT in tumor compartment
gamma_LN_ENT	0.2	dimensionless	Volume fraction of interstitial space available to ENT in TDLN compartment
Vmcl	8070	microgram/hour	Maximum elimination rate of nab-paclitaxel from the central compartment V1
Kcl	40.2	microgram/liter	Nab-paclitaxel concentration in the central compartment V1 at 50% Vmcl
Q2	41.6	liter/hour	Intercompartmental clearance between the central compartment V1 and the second peripheral compartment V3
Vmt	325000	microgram/hour	Maximum intercompartmental distribution rate between the central compartment V1 and the first peripheral compartment V2
Kt	4260	microgram/liter	Nab-paclitaxel concentration in the central compartment V1 at 50% Vmt
BSA	1.9	meter^2	Body surface area
r_nabp	1.5	dimensionless	Tumour to plasma concentration ratio of nab-paclitaxel (Yang 2007, PMID: 17828616; Rajeshkumar 2016, PMID: 27441498)
k_C_nabp	0.057	1/hour	Cancer cell killing rate by nab-paclitaxel (Choi 2012, PMID: 23023313)
IC50_nabp	4.7e-08	molarity	Half-maximal nab-paclitaxel concentration for cancer cell killing (Yang 2013, PMID: 23180760)
MW_nabp	853.9	gram/mole	Molecular weight of nab-paclitaxel (calculated)
Kc_cyt	80000000	cell	Half-Maximal cancer cell number for cytotoxic drug diffusion (estimated based on Kyle 2007, PMID: 17473214)
k_C_resist	0.0001	1/day	Cancer resistance to nab-paclitaxel (estimated)
r_resist	100	dimensionless	Number of folds increase of nab-paclitaxel EC50 in resistant cancer clones (Nemcova-Furstova 2016, PMID: 27664577)
k_K_g	4.93	1/day	Tumour vasculature growth rate (Desai 2006, PMID: 16489089)
k_K_d	0.002	1/day	Tumour vasculature inhibition rate (Desai 2006, PMID: 16489089)
k_c_nabp	0.017	picogram/cell/day	Secretion rate of angiogenic factors induced by nab-paclitaxel (Volk 2008, PMID: 18516298)
IC50_nabp_vas	6.2e-09	molarity	Half-maximal conc. of nab-paclitaxel on angiogenic factor induction (Volk 2008, PMID: 18516298)
k_c_vas	0.0034	picogram/cell/day	Secretion rate of angiogenic factors by cancer cells (Volk 2008, PMID: 18516298)
k_c_deg	11	1/day	Degradation rate of angiogenic factors (Finley 2011, PMID: 22104283)
IC50_vas	150000	picogram/milliliter	Half-maximal conc. of angiogenic factor on tumor capacity growth (Desai 2006, PMID: 16489089)
k_endo_nabp	17.8	1/hour/molarity	Inhibition rate of maximal tumor capacity by nab-paclitaxel (Mollard 2017, PMID: 28416742)
k_Th_act	10	1/day	Rate of T helper cell activation (Robertson-Tessi 2012, PMID: 22051568)
k_reg	0.022	1/day	Th differentiation rate to Treg (Robertson-Tessi 2012, PMID: 22051568)
k_TGF_Tsec	1.2e-10	nanomole/cell/day	TGF secretion rate by Treg (Liyanage 2002, PMID: 12193750)
k_TGF_deg	14.3	1/day	TGF degradtion rate (Robertson-Tessi 2012, PMID: 22051568)
TGF_50_reg	1.4e-10	molarity	Half-Maximal TGFb level for differentiation of Th to Treg (Robertson-Tessi 2012, PMID: 22051568)
TGF_50_ctl	2.8e-10	molarity	Half-Maximal TGFb level for CD8 T cell inhibition (Robertson-Tessi 2012, PMID: 22051568)
Kc_rec	20200000	cell^2	Half-Maximal cancer cell number for T cell recruitment (Phillis 2006, PMID: 16153659)
TGFbase	8e-11	molarity	Baseline TGFb level in breast tumor (Panis 2013, PMID: 23393376)
k_IFNg_sec	4e-13	nanomole/cell/day	IFNg secretion rate by T helper cell (Borj 2017, doi:10.15171/ijbms.2017.05)
k_IFNg_deg	11	1/day	IFNg degradation rate (Hofstra 1998, PMID: 9806748)
IFNg_50_ind	2.96e-12	molarity	Half-Maximal IFNg level for PD-L1 induction (Shin 2017, PMID: 27903500)
H_TGF_reg	1	dimensionless	Hill function of TGFb for Th transdifferentiation to Treg
H_TGF_CTL	1	dimensionless	Hill function of TGFb for Teff inhibition and chemoresistance development
N_aTh	1	dimensionless	Number of Activated T Helper Cell Generations (see Rules)

## Sheet: Table S5. Reactions
ID	Reaction	ReactionRate	Notes
1	V_T.C_x -> null	k_cell_clear*V_T.C_x	Clearance of dead cancer cells from tumor
2	V_T.T1_exh -> null	k_cell_clear*V_T.T1_exh	Clearance of exhausted CD8 T cells from tumor
3	V_T.Th_exh -> null	k_cell_clear*V_T.Th_exh	Clearance of exhausted CD4 T cells from tumor
4	null -> V_T.C1	k_C1_growth*V_T.C1*log(max(C_max/(C_total+cell),1))*(1-H_ENT_C1)	Cancer cell growth
5	V_T.C1 -> V_T.C_x	k_C1_death*V_T.C1	Cancer cell death
6	null -> V_T.C2	k_C2_growth*V_T.C2*log(max(C_max/(C_total+cell),1))*(1-H_ENT_C1)	Cancer cell growth
7	V_T.C2 -> V_T.C_x	k_C2_death*V_T.C2	Cancer cell death
8	null -> V_C.nT0	Q_nT0_thym/div_T0	Thymic output of naive T cell to blood
9	null -> V_P.nT0	k_nT0_pro/div_T0*V_P.nT0/(K_nT0_pro/div_T0+V_P.nT0)	Naive T cell proliferation in the peripheral compartment
10	null -> V_LN.nT0	k_nT0_pro/div_T0*V_LN.nT0/(K_nT0_pro/div_T0+V_LN.nT0)	Naive T cell proliferation in the TDLN compartment
11	V_P.nT0 -> null	k_nT0_death*V_P.nT0	Naive T cell death in the peripheral compartment
12	V_C.nT0 -> null	k_nT0_death*V_C.nT0	Naive T cell death in the central compartment
13	V_LN.nT0 -> null	k_nT0_death*V_LN.nT0	Naive T cell death in the TDLN compartment
14	V_T.nT0 -> null	k_nT0_death*V_T.nT0	Naive T cell death in the tumor compartment
15	V_C.nT0 -> V_P.nT0	q_nT0_P_in*V_C.nT0	Naive T cell entry into the peripheral compartment
16	V_P.nT0 -> V_C.nT0	q_nT0_P_out*V_P.nT0	Naive T cell exit from the peripheral compartment
17	V_C.nT0 -> V_LN.nT0	q_T0_LN_in*V_C.nT0	Naive T cell entry into the lymph node
18	V_LN.nT0 -> V_C.nT0	q_nT0_LN_out*V_LN.nT0	Naive T cell exit from the lymph node
19	V_LN.nT0 -> null	k_T0_act*H_APC*H_P0*V_LN.nT0	Naive T cell activation
20	null -> V_LN.aT0	k_T0_act*H_APC*H_P0*V_LN.nT0*n_T0_clones	Naive T cell activation
21	V_LN.aT0 -> null	k_T0_pro/N_aT0*V_LN.aT0	aT0 cell proliferation
22	null -> V_LN.T0	k_T0_pro/N_aT0*2^(N_aT0)*V_LN.aT0	aT0 cell proliferation
23	V_C.T0 -> null	k_T0_death*V_C.T0	T cell death in the central compartment
24	V_P.T0 -> null	k_T0_death*V_P.T0	T cell death in the peripheral compartment
25	V_LN.T0 -> null	k_T0_death*V_LN.T0	T cell death in the lymph node compartment
26	V_T.T0 -> null	k_T0_death*V_T.T0	T cell death in the tumor compartment
27	V_C.T0 -> V_P.T0	q_T0_P_in*V_C.T0	T cell transport into the peripheral compartment
28	V_P.T0 -> V_C.T0	q_T0_P_out*V_P.T0	T cell transport out of the peripheral compartment
29	V_C.T0 -> V_T.T0	q_T0_T_in*V_T*V_C.T0*(C_total^2/(C_total^2+Kc_rec))	T cell transport into the tumor compartment
30	V_LN.T0 -> V_C.T0	q_T0_LN_out*V_LN.T0	T cell transport out of the lymph node compartment
31	V_LN.IL2 -> null	k_IL2_deg*V_LN.IL2*V_LN	IL2 degradation
32	V_LN.IL2 -> null	k_IL2_cons*V_LN.T1*V_LN.IL2/(IL2_50+V_LN.IL2)	IL2 consumption by T cells
33	V_LN.IL2 -> null	k_IL2_cons*V_LN.T0*V_LN.IL2/(IL2_50_Treg+V_LN.IL2)	IL2 consumption by Tregs
34	null -> V_C.nT1	Q_nT1_thym/div_T1	Thymic output of naive T cell to blood
35	null -> V_P.nT1	k_nT1_pro/div_T1*V_P.nT1/(K_nT1_pro/div_T1+V_P.nT1)	Naive T cell proliferation in the peripheral compartment
36	null -> V_LN.nT1	k_nT1_pro/div_T1*V_LN.nT1/(K_nT1_pro/div_T1+V_LN.nT1)	Naive T cell proliferation in the TDLN compartment
37	V_P.nT1 -> null	k_nT1_death*V_P.nT1	Naive T cell death in the peripheral compartment
38	V_C.nT1 -> null	k_nT1_death*V_C.nT1	Naive T cell death in the central compartment
39	V_LN.nT1 -> null	k_nT1_death*V_LN.nT1	Naive T cell death in the TDLN compartment
40	V_T.nT1 -> null	k_nT1_death*V_T.nT1	Naive T cell death in the tumor compartment
41	V_C.nT1 -> V_P.nT1	q_nT1_P_in*V_C.nT1	Naive T cell entry into the peripheral compartment
42	V_P.nT1 -> V_C.nT1	q_nT1_P_out*V_P.nT1	Naive T cell exit from the peripheral compartment
43	V_C.nT1 -> V_LN.nT1	q_T1_LN_in*V_C.nT1	Naive T cell entry into the lymph node
44	V_LN.nT1 -> V_C.nT1	q_nT1_LN_out*V_LN.nT1	Naive T cell exit from the lymph node
45	V_LN.nT1 -> null	k_T1_act*H_mAPC*H_P1*V_LN.nT1	Naive T cell activation
46	null -> V_LN.aT1	k_T1_act*H_mAPC*H_P1*V_LN.nT1*n_T1_clones	Naive T cell activation
47	V_LN.aT1 -> null	k_T1_pro/N_aT*V_LN.aT1	aT1 cell proliferation
48	null -> V_LN.T1	k_T1_pro/N_aT*2^(N_aT)*V_LN.aT1	aT1 cell proliferation
49	V_C.T1 -> null	k_T1_death*V_C.T1	T cell death in the central compartment
50	V_P.T1 -> null	k_T1_death*V_P.T1	T cell death in the peripheral compartment
51	V_LN.T1 -> null	k_T1_death*V_LN.T1	T cell death in the lymph node compartment
52	V_T.T1 -> V_T.T1_exh	k_T1_death*V_T.T1	T cell death in the tumor compartment
53	V_T.T1 -> V_T.T1_exh	k_Treg*V_T.T1*Tregs_/(V_T.T1+Tregs_+cell)	T cell death from Tregs
54	V_T.T1 -> V_T.T1_exh	k_T1*V_T.T1*C_total/(C_total+V_T.T1+cell)*H_PD1_C1	T cell death from cancer
55	V_C.T1 -> V_P.T1	q_T1_P_in*V_C.T1	T cell transport into the peripheral compartment
56	V_P.T1 -> V_C.T1	q_T1_P_out*V_P.T1	T cell transport out of the peripheral compartment
57	V_C.T1 -> V_T.T1	q_T1_T_in*V_T*V_C.T1*(C_total^2/(C_total^2+Kc_rec))	T cell transport into the tumor compartment
58	V_LN.T1 -> V_C.T1	q_T1_LN_out*V_LN.T1	T cell transport out of the lymph node compartment
59	null -> V_LN.IL2	k_IL2_sec*V_LN.aT1	IL2 secretion from activated T cells
60	V_T.C1 -> V_T.C_x	k_C_T1*V_T.C1*V_T.T1/(1.2*V_T.C1+V_T.T1+cell)*V_T.T1/(V_T.T1+11*Tregs_+cell)*(1-H_TGF_CTL)*(1-H_PD1_C1)*(1-H_MDSC_C1)	Cancer cell killing by T cells
61	V_T.C2 -> V_T.C_x	k_C_T1*V_T.C2*V_T.T1/(1.2*V_T.C2+V_T.T1+cell)*V_T.T1/(V_T.T1+11*Tregs_+cell)*(1-H_TGF_CTL)*(1-H_PD1_C1)*(1-H_MDSC_C1)	Cancer cell killing by T cells
62	null -> V_T.APC	k_APC_death*(APC0_T*V_T-V_T.APC)	APC recruitment/death in the tumour
63	null -> V_LN.APC	k_APC_death*(APC0_LN*V_LN-V_LN.APC)	APC recruitment/death in LN
64	V_T.APC -> V_T.mAPC	k_APC_mat*c/(c+c50)*V_T.APC	APC maturation in the tumour
65	V_T.mAPC -> V_LN.mAPC	k_APC_mig*V_T.mAPC	APC migration to the lymph node
66	V_T.mAPC -> null	k_mAPC_death*V_T.mAPC	mAPC death in the tumour
67	V_LN.mAPC -> null	k_mAPC_death*V_LN.mAPC	mAPC death in the lymph node
68	null -> V_T.c	k_c*(c0-V_T.c)	Baseline cytokine secretion/degradation
69	null -> V_T.c	R_Tcell*DAMPs	Cytokine release in response to the tumour
70	A_e.M1 -> A_s.M1	kout*A_e.M1*A_e-kin*A_s.M1*A_s	MHC translocation
71	null -> V_T.P0	n_T0_clones*(P0_C1*(k_C1_death+k_C1_therapy)*C1+P0_C1*k_C_T1*V_T.C1*V_T.T1/(1.2*V_T.C1+V_T.T1+cell)*V_T.T1/(V_T.T1+11*Tregs_+cell)*(1-H_TGF_CTL)*(1-H_PD1_C1)*(1-H_MDSC_C1)+P0_C2*(k_C2_death+k_C2_therapy)*C2+P0_C2*k_C_T1*V_T.C2*V_T.T1/(1.2*V_T.C2+V_T.T1+cell)*V_T.T1/(V_T.T1+11*Tregs_+cell)*(1-H_TGF_CTL)*(1-H_PD1_C1)*(1-H_MDSC_C1))	Antigen deposition from dying cancer cells
72	V_T.P0 -> null	k_xP0_deg*V_T.P0*V_T	Free antigen degradation
73	V_T.P0 -> null	k_P0_up*V_T.APC*V_T.P0*V_T	Antigen uptake by mature antigen presenting cells
74	null -> V_e.P0	k_P0_up*cell*V_T.P0*V_e	Antigen uptake by mature antigen presenting cells
75	V_e.P0 -> V_e.p0	k_P0_deg*V_e.P0*V_e	Antigen degradation in APC endosomes
76	V_e.p0 -> null	k_p0_deg*V_e.p0*V_e	Epitope degradation in APC endosomes
77	V_e.p0 + A_e.M1 -> A_e.M1p0	k_P0_on*V_e.p0*A_e.M1*A_e	Antigen-MHC binding in endosome
78	A_e.M1p0 -> V_e.p0 + A_e.M1	k_P0_d1*k_P0_on*A_e.M1p0*A_e	Antigen-MHC unbinding in endosome
79	A_s.M1p0 -> A_s.M1	k_P0_d1*k_P0_on*A_s.M1p0*A_s	Antigen-MHC unbinding on APC surface
80	A_e.M1p0 -> A_s.M1p0	kout*A_e.M1p0*A_e	Antigen-MHC translocation
81	null -> V_T.P1	n_T1_clones*(P1_C1*(k_C1_death+k_C1_therapy)*C1+P1_C1*k_C_T1*V_T.C1*V_T.T1/(1.2*V_T.C1+V_T.T1+cell)*V_T.T1/(V_T.T1+11*Tregs_+cell)*(1-H_TGF_CTL)*(1-H_PD1_C1)*(1-H_MDSC_C1)+P1_C2*(k_C2_death+k_C2_therapy)*C2+P1_C2*k_C_T1*V_T.C2*V_T.T1/(1.2*V_T.C2+V_T.T1+cell)*V_T.T1/(V_T.T1+11*Tregs_+cell)*(1-H_TGF_CTL)*(1-H_PD1_C1)*(1-H_MDSC_C1))	Antigen deposition from dying cancer cells
82	V_T.P1 -> null	k_xP1_deg*V_T.P1*V_T	Free antigen degradation
83	V_T.P1 -> null	k_P1_up*V_T.APC*V_T.P1*V_T	Antigen uptake by mature antigen presenting cells
84	null -> V_e.P1	k_P1_up*cell*V_T.P1*V_e	Antigen uptake by mature antigen presenting cells
85	V_e.P1 -> V_e.p1	k_P1_deg*V_e.P1*V_e	Antigen degradation in APC endosomes
86	V_e.p1 -> null	k_p1_deg*V_e.p1*V_e	Epitope degradation in APC endosomes
87	V_e.p1 + A_e.M1 -> A_e.M1p1	k_P1_on*V_e.p1*A_e.M1*A_e	Antigen-MHC binding in endosome
88	A_e.M1p1 -> V_e.p1 + A_e.M1	k_P1_d1*k_P1_on*A_e.M1p1*A_e	Antigen-MHC unbinding in endosome
89	A_s.M1p1 -> A_s.M1	k_P1_d1*k_P1_on*A_s.M1p1*A_s	Antigen-MHC unbinding on APC surface
90	A_e.M1p1 -> A_s.M1p1	kout*A_e.M1p1*A_e	Antigen-MHC translocation
91	V_C.nivo <-> V_P.nivo	q_P_nivo*(V_C.nivo/gamma_C_nivo-V_P.nivo/gamma_P_nivo)	nivo diffusive transport to peripheral compartment
92	V_C.nivo <-> V_T.nivo	q_T_nivo*(V_C.nivo/gamma_C_nivo-V_T.nivo/gamma_T_nivo)	nivo diffusive transport to tumor compartment
93	V_C.nivo <-> V_LN.nivo	q_LN_nivo*(V_C.nivo/gamma_C_nivo-V_LN.nivo/gamma_LN_nivo)	nivo diffusive transport to lymph node compartment
94	V_T.nivo -> V_LN.nivo	q_LD_nivo*V_T.nivo/gamma_T_nivo	nivo convective transport from tumor to lymph node
95	V_LN.nivo -> V_C.nivo	q_LD_nivo*V_LN.nivo/gamma_LN_nivo	nivo convective transport from lymph node to central
96	V_C.nivo -> null	k_cl_nivo*V_C.nivo	Drug clearance from central compartment
97	V_C.atezo <-> V_P.atezo	q_P_atezo*(V_C.atezo/gamma_C_atezo-V_P.atezo/gamma_P_atezo)	atezo diffusive transport to peripheral compartment
98	V_C.atezo <-> V_T.atezo	q_T_atezo*(V_C.atezo/gamma_C_atezo-V_T.atezo/gamma_T_atezo)	atezo diffusive transport to tumor compartment
99	V_C.atezo <-> V_LN.atezo	q_LN_atezo*(V_C.atezo/gamma_C_atezo-V_LN.atezo/gamma_LN_atezo)	atezo diffusive transport to lymph node compartment
100	V_T.atezo -> V_LN.atezo	q_LD_atezo*V_T.atezo/gamma_T_atezo	atezo convective transport from tumor to lymph node
101	V_LN.atezo -> V_C.atezo	q_LD_atezo*V_LN.atezo/gamma_LN_atezo	atezo convective transport from lymph node to central
102	V_C.atezo -> null	k_cl_atezo*V_C.atezo	Drug clearance from central compartment
103	V_C.ipi <-> V_P.ipi	q_P_ipi*(V_C.ipi/gamma_C_ipi-V_P.ipi/gamma_P_ipi)	ipi diffusive transport to peripheral compartment
104	V_C.ipi <-> V_T.ipi	q_T_ipi*(V_C.ipi/gamma_C_ipi-V_T.ipi/gamma_T_ipi)	ipi diffusive transport to tumor compartment
105	V_C.ipi <-> V_LN.ipi	q_LN_ipi*(V_C.ipi/gamma_C_ipi-V_LN.ipi/gamma_LN_ipi)	ipi diffusive transport to lymph node compartment
106	V_T.ipi -> V_LN.ipi	q_LD_ipi*V_T.ipi/gamma_T_ipi	ipi convective transport from tumor to lymph node
107	V_LN.ipi -> V_C.ipi	q_LD_ipi*V_LN.ipi/gamma_LN_ipi	ipi convective transport from lymph node to central
108	V_C.ipi -> null	k_cl_ipi*V_C.ipi	Drug clearance from central compartment
109	null -> syn_T_C1.PDL1	k_out_PDL1*V_T.IFNg/(V_T.IFNg+IFNg_50_ind)*(1-syn_T_C1.PDL1_total/(C1_PDL1_base*r_PDL1_IFNg/A_cell))	Translocation of PDL1 between cell surface and cytoplasm
110	null -> syn_T_C1.PDL2	k_out_PDL1*r_PDL2C1*V_T.IFNg/(V_T.IFNg+IFNg_50_ind)*(1-syn_T_C1.PDL2_total/(C1_PDL1_base*r_PDL1_IFNg/A_cell*r_PDL2C1))	Translocation of PDL2 between cell surface and cytoplasm
111	null -> syn_T_C1.PDL1	k_in_PDL1*(C1_PDL1_base/A_cell-syn_T_C1.PDL1_total)	Translocation of PDL1 between cell surface and cytoplasm
112	null -> syn_T_C1.PDL2	k_in_PDL1*(C1_PDL1_base/A_cell*r_PDL2C1-syn_T_C1.PDL2_total)	Translocation of PDL2 between cell surface and cytoplasm
113	syn_T_C1.PD1 + syn_T_C1.PDL1 <-> syn_T_C1.PD1_PDL1	kon_PD1_PDL1*(syn_T_C1.PD1)*(syn_T_C1.PDL1) - koff_PD1_PDL1*syn_T_C1.PD1_PDL1	binding and unbinding of PD1 PDL1 in synapse
114	syn_T_C1.PD1 + syn_T_C1.PDL2 <-> syn_T_C1.PD1_PDL2	kon_PD1_PDL2*(syn_T_C1.PD1)*(syn_T_C1.PDL2) - koff_PD1_PDL2*syn_T_C1.PD1_PDL2	binding and unbinding of PD1 PDL2 in synapse
115	syn_T_C1.PD1 <-> syn_T_C1.PD1_nivo	2*kon_PD1_nivo*(syn_T_C1.PD1 * V_T.nivo/gamma_T_nivo) - koff_PD1_nivo*syn_T_C1.PD1_nivo	binding and unbinding of PD1 to Nivo on T surface in synapse
116	syn_T_C1.PD1_nivo + syn_T_C1.PD1 <-> syn_T_C1.PD1_nivo_PD1	Chi_PD1_nivo*kon_PD1_nivo*(syn_T_C1.PD1 * syn_T_C1.PD1_nivo) - 2*koff_PD1_nivo*syn_T_C1.PD1_nivo_PD1	binding and unbinding of PD1 to PD1-Nivo on T surface in synapse
117	syn_T_C1.PDL1 <-> syn_T_C1.PDL1_atezo	2*kon_PDL1_atezo*(syn_T_C1.PDL1 * V_T.atezo/gamma_T_atezo) - koff_PDL1_atezo*syn_T_C1.PDL1_atezo	binding and unbinding of PDL1 to atezo on C1 surface in synapse
118	syn_T_C1.PDL1_atezo + syn_T_C1.PDL1 <-> syn_T_C1.PDL1_atezo_PDL1	Chi_PDL1_atezo*kon_PDL1_atezo*(syn_T_C1.PDL1 * syn_T_C1.PDL1_atezo) - 2*koff_PDL1_atezo*syn_T_C1.PDL1_atezo_PDL1	binding and unbinding of PDL1 to PDL1-atezo on C1 surface in synapse
119	syn_T_C1.CD28 + syn_T_C1.CD80 <-> syn_T_C1.CD28_CD80	2*kon_CD28_CD80*(syn_T_C1.CD28)*(syn_T_C1.CD80) - koff_CD28_CD80*syn_T_C1.CD28_CD80	binding and unbinding of CD28 and CD80 in synapse
120	syn_T_C1.CD28_CD80 + syn_T_C1.CD28 <-> syn_T_C1.CD28_CD80_CD28	kon_CD28_CD80*(syn_T_C1.CD28)*(syn_T_C1.CD28_CD80) - 2*koff_CD28_CD80*syn_T_C1.CD28_CD80_CD28	binding and unbinding of CD28-CD80 and CD28 in synapse
121	syn_T_C1.CD28 + syn_T_C1.CD86 <-> syn_T_C1.CD28_CD86	kon_CD28_CD86*(syn_T_C1.CD28)*(syn_T_C1.CD86) - koff_CD28_CD86*syn_T_C1.CD28_CD86	binding and unbinding of CD28 and CD86 in synapse
122	syn_T_C1.CTLA4 + syn_T_C1.CD80 <-> syn_T_C1.CD80_CTLA4	4*kon_CTLA4_CD80*(syn_T_C1.CTLA4)*(syn_T_C1.CD80) - koff_CTLA4_CD80*syn_T_C1.CD80_CTLA4	binding and unbinding of CTLA4 and CD80 in synapse
123	syn_T_C1.CTLA4 + syn_T_C1.CD80_CTLA4 <-> syn_T_C1.CTLA4_CD80_CTLA4	kon_CTLA4_CD80*(syn_T_C1.CTLA4)*(syn_T_C1.CD80_CTLA4) - 2*koff_CTLA4_CD80*syn_T_C1.CTLA4_CD80_CTLA4	binding and unbinding of CTLA4 and CD80-CTLA4 in synapse
124	syn_T_C1.CD80 + syn_T_C1.CTLA4_CD80_CTLA4 <-> syn_T_C1.CD80_CTLA4_CD80_CTLA4	kon_CTLA4_CD80*(syn_T_C1.CD80)*(syn_T_C1.CTLA4_CD80_CTLA4) - koff_CTLA4_CD80*syn_T_C1.CD80_CTLA4_CD80_CTLA4	binding and unbinding of CD80 and CTLA4-CD80-CTLA4 in synapse
125	syn_T_C1.CD80_CTLA4 + syn_T_C1.CD80 <-> syn_T_C1.CD80_CTLA4_CD80	kon_CTLA4_CD80*(syn_T_C1.CD80_CTLA4)*(syn_T_C1.CD80) - 2*koff_CTLA4_CD80*syn_T_C1.CD80_CTLA4_CD80	binding and unbinding of CD80-CTLA4 and CD80 in synapse
126	syn_T_C1.CTLA4 + syn_T_C1.CD80_CTLA4_CD80 <-> syn_T_C1.CD80_CTLA4_CD80_CTLA4	kon_CTLA4_CD80*(syn_T_C1.CTLA4)*(syn_T_C1.CD80_CTLA4_CD80) - koff_CTLA4_CD80*syn_T_C1.CD80_CTLA4_CD80_CTLA4	binding and unbinding of CTLA4 and CD80-CTLA4-CD80 in synapse
127	syn_T_C1.CTLA4 + syn_T_C1.CD86 <-> syn_T_C1.CD86_CTLA4	2*kon_CTLA4_CD86*(syn_T_C1.CTLA4)*(syn_T_C1.CD86) - koff_CTLA4_CD86*syn_T_C1.CD86_CTLA4	binding and unbinding of CTLA4 and CD86 in synapse
128	syn_T_C1.CD86_CTLA4 + syn_T_C1.CD86 <-> syn_T_C1.CD86_CTLA4_CD86	kon_CTLA4_CD86*(syn_T_C1.CD86_CTLA4)*(syn_T_C1.CD86) - 2*koff_CTLA4_CD86*syn_T_C1.CD86_CTLA4_CD86	binding and unbinding of CD86-CTLA4 and CD86 in synapse
129	syn_T_C1.CTLA4 <-> syn_T_C1.CTLA4_ipi	4*kon_CTLA4_ipi*(syn_T_C1.CTLA4 * V_T.ipi/gamma_T_ipi) - koff_CTLA4_ipi*syn_T_C1.CTLA4_ipi	binding and unbinding of CTLA4 to Ipi on T surface in synapse
130	syn_T_C1.CTLA4_ipi + syn_T_C1.CTLA4 <-> syn_T_C1.CTLA4_ipi_CTLA4	Chi_CTLA4_ipi*kon_CTLA4_ipi*(syn_T_C1.CTLA4 * syn_T_C1.CTLA4_ipi) - 2*koff_CTLA4_ipi*syn_T_C1.CTLA4_ipi_CTLA4	binding and unbinding of CTLA4 to Ipi on T surface in synapse
131	syn_T_C1.CD80 + syn_T_C1.TPDL1 <-> syn_T_C1.TPDL1_CD80	2*kon_CD80_PDL1*(syn_T_C1.CD80)*(syn_T_C1.TPDL1) - koff_CD80_PDL1*syn_T_C1.TPDL1_CD80	binding and unbinding of CD80 and PDL1 in synapse
132	syn_T_C1.TPDL1_CD80 + syn_T_C1.TPDL1 <-> syn_T_C1.TPDL1_CD80_TPDL1	kon_CD80_PDL1*(syn_T_C1.TPDL1_CD80)*(syn_T_C1.TPDL1) - 2*koff_CD80_PDL1*syn_T_C1.TPDL1_CD80_TPDL1	binding and unbinding of PDL1-CD80 and PDL1 in synapse
133	syn_T_C1.TPDL1 <-> syn_T_C1.TPDL1_atezo	2*kon_PDL1_atezo*(syn_T_C1.TPDL1 * V_T.atezo/gamma_T_atezo) - koff_PDL1_atezo*syn_T_C1.TPDL1_atezo	binding and unbinding of PDL1 to atezo on C1 surface in synapse
134	syn_T_C1.TPDL1_atezo + syn_T_C1.TPDL1 <-> syn_T_C1.TPDL1_atezo_TPDL1	Chi_PDL1_atezo*kon_PDL1_atezo*(syn_T_C1.TPDL1 * syn_T_C1.TPDL1_atezo) - 2*koff_PDL1_atezo*syn_T_C1.TPDL1_atezo_TPDL1	binding and unbinding of PDL1 to PDL1-atezo on C1 surface in synapse
135	null -> syn_T_APC.PDL1	k_out_PDL1*V_T.IFNg/(V_T.IFNg+IFNg_50_ind)*(1-syn_T_APC.PDL1_total/(APC_PDL1_base*r_PDL1_IFNg/A_cell))	Translocation of PDL1 between cell surface and cytoplasm
136	null -> syn_T_APC.PDL2	k_out_PDL1*r_PDL2APC*V_T.IFNg/(V_T.IFNg+IFNg_50_ind)*(1-syn_T_APC.PDL2_total/(APC_PDL1_base*r_PDL1_IFNg/A_cell*r_PDL2APC))	Translocation of PDL2 between cell surface and cytoplasm
137	null -> syn_T_APC.PDL1	k_in_PDL1*(APC_PDL1_base/A_cell-syn_T_APC.PDL1_total)	Translocation of PDL1 between cell surface and cytoplasm
138	null -> syn_T_APC.PDL2	k_in_PDL1*(APC_PDL1_base/A_cell*r_PDL2APC-syn_T_APC.PDL2_total)	Translocation of PDL2 between cell surface and cytoplasm
139	syn_T_APC.PD1 + syn_T_APC.PDL1 <-> syn_T_APC.PD1_PDL1	kon_PD1_PDL1*(syn_T_APC.PD1)*(syn_T_APC.PDL1) - koff_PD1_PDL1*syn_T_APC.PD1_PDL1	binding and unbinding of PD1 PDL1 in synapse
140	syn_T_APC.PD1 + syn_T_APC.PDL2 <-> syn_T_APC.PD1_PDL2	kon_PD1_PDL2*(syn_T_APC.PD1)*(syn_T_APC.PDL2) - koff_PD1_PDL2*syn_T_APC.PD1_PDL2	binding and unbinding of PD1 PDL2 in synapse
141	syn_T_APC.PD1 <-> syn_T_APC.PD1_nivo	2*kon_PD1_nivo*(syn_T_APC.PD1 * V_LN.nivo/gamma_LN_nivo) - koff_PD1_nivo*syn_T_APC.PD1_nivo	binding and unbinding of PD1 to Nivo on T surface in synapse
142	syn_T_APC.PD1_nivo + syn_T_APC.PD1 <-> syn_T_APC.PD1_nivo_PD1	Chi_PD1_nivo*kon_PD1_nivo*(syn_T_APC.PD1 * syn_T_APC.PD1_nivo) - 2*koff_PD1_nivo*syn_T_APC.PD1_nivo_PD1	binding and unbinding of PD1 to PD1-Nivo on T surface in synapse
143	syn_T_APC.PDL1 <-> syn_T_APC.PDL1_atezo	2*kon_PDL1_atezo*(syn_T_APC.PDL1 * V_LN.atezo/gamma_LN_atezo) - koff_PDL1_atezo*syn_T_APC.PDL1_atezo	binding and unbinding of PDL1 to atezo on APC surface in synapse
144	syn_T_APC.PDL1_atezo + syn_T_APC.PDL1 <-> syn_T_APC.PDL1_atezo_PDL1	Chi_PDL1_atezo*kon_PDL1_atezo*(syn_T_APC.PDL1 * syn_T_APC.PDL1_atezo) - 2*koff_PDL1_atezo*syn_T_APC.PDL1_atezo_PDL1	binding and unbinding of PDL1 to PDL1-atezo on APC surface in synapse
145	syn_T_APC.CD28 + syn_T_APC.CD80 <-> syn_T_APC.CD28_CD80	2*kon_CD28_CD80*(syn_T_APC.CD28)*(syn_T_APC.CD80) - koff_CD28_CD80*syn_T_APC.CD28_CD80	binding and unbinding of CD28 and CD80 in synapse
146	syn_T_APC.CD28_CD80 + syn_T_APC.CD28 <-> syn_T_APC.CD28_CD80_CD28	kon_CD28_CD80*(syn_T_APC.CD28)*(syn_T_APC.CD28_CD80) - 2*koff_CD28_CD80*syn_T_APC.CD28_CD80_CD28	binding and unbinding of CD28-CD80 and CD28 in synapse
147	syn_T_APC.CD28 + syn_T_APC.CD86 <-> syn_T_APC.CD28_CD86	kon_CD28_CD86*(syn_T_APC.CD28)*(syn_T_APC.CD86) - koff_CD28_CD86*syn_T_APC.CD28_CD86	binding and unbinding of CD28 and CD86 in synapse
148	syn_T_APC.CTLA4 + syn_T_APC.CD80 <-> syn_T_APC.CD80_CTLA4	4*kon_CTLA4_CD80*(syn_T_APC.CTLA4)*(syn_T_APC.CD80) - koff_CTLA4_CD80*syn_T_APC.CD80_CTLA4	binding and unbinding of CTLA4 and CD80 in synapse
149	syn_T_APC.CTLA4 + syn_T_APC.CD80_CTLA4 <-> syn_T_APC.CTLA4_CD80_CTLA4	kon_CTLA4_CD80*(syn_T_APC.CTLA4)*(syn_T_APC.CD80_CTLA4) - 2*koff_CTLA4_CD80*syn_T_APC.CTLA4_CD80_CTLA4	binding and unbinding of CTLA4 and CD80-CTLA4 in synapse
150	syn_T_APC.CD80 + syn_T_APC.CTLA4_CD80_CTLA4 <-> syn_T_APC.CD80_CTLA4_CD80_CTLA4	kon_CTLA4_CD80*(syn_T_APC.CD80)*(syn_T_APC.CTLA4_CD80_CTLA4) - koff_CTLA4_CD80*syn_T_APC.CD80_CTLA4_CD80_CTLA4	binding and unbinding of CD80 and CTLA4-CD80-CTLA4 in synapse
151	syn_T_APC.CD80_CTLA4 + syn_T_APC.CD80 <-> syn_T_APC.CD80_CTLA4_CD80	kon_CTLA4_CD80*(syn_T_APC.CD80_CTLA4)*(syn_T_APC.CD80) - 2*koff_CTLA4_CD80*syn_T_APC.CD80_CTLA4_CD80	binding and unbinding of CD80-CTLA4 and CD80 in synapse
152	syn_T_APC.CTLA4 + syn_T_APC.CD80_CTLA4_CD80 <-> syn_T_APC.CD80_CTLA4_CD80_CTLA4	kon_CTLA4_CD80*(syn_T_APC.CTLA4)*(syn_T_APC.CD80_CTLA4_CD80) - koff_CTLA4_CD80*syn_T_APC.CD80_CTLA4_CD80_CTLA4	binding and unbinding of CTLA4 and CD80-CTLA4-CD80 in synapse
153	syn_T_APC.CTLA4 + syn_T_APC.CD86 <-> syn_T_APC.CD86_CTLA4	2*kon_CTLA4_CD86*(syn_T_APC.CTLA4)*(syn_T_APC.CD86) - koff_CTLA4_CD86*syn_T_APC.CD86_CTLA4	binding and unbinding of CTLA4 and CD86 in synapse
154	syn_T_APC.CD86_CTLA4 + syn_T_APC.CD86 <-> syn_T_APC.CD86_CTLA4_CD86	kon_CTLA4_CD86*(syn_T_APC.CD86_CTLA4)*(syn_T_APC.CD86) - 2*koff_CTLA4_CD86*syn_T_APC.CD86_CTLA4_CD86	binding and unbinding of CD86-CTLA4 and CD86 in synapse
155	syn_T_APC.CTLA4 <-> syn_T_APC.CTLA4_ipi	4*kon_CTLA4_ipi*(syn_T_APC.CTLA4 * V_LN.ipi/gamma_LN_ipi) - koff_CTLA4_ipi*syn_T_APC.CTLA4_ipi	binding and unbinding of CTLA4 to Ipi on T surface in synapse
156	syn_T_APC.CTLA4_ipi + syn_T_APC.CTLA4 <-> syn_T_APC.CTLA4_ipi_CTLA4	Chi_CTLA4_ipi*kon_CTLA4_ipi*(syn_T_APC.CTLA4 * syn_T_APC.CTLA4_ipi) - 2*koff_CTLA4_ipi*syn_T_APC.CTLA4_ipi_CTLA4	binding and unbinding of CTLA4 to Ipi on T surface in synapse
157	syn_T_APC.CD80 + syn_T_APC.TPDL1 <-> syn_T_APC.TPDL1_CD80	2*kon_CD80_PDL1*(syn_T_APC.CD80)*(syn_T_APC.TPDL1) - koff_CD80_PDL1*syn_T_APC.TPDL1_CD80	binding and unbinding of CD80 and PDL1 in synapse
158	syn_T_APC.TPDL1_CD80 + syn_T_APC.TPDL1 <-> syn_T_APC.TPDL1_CD80_TPDL1	kon_CD80_PDL1*(syn_T_APC.TPDL1_CD80)*(syn_T_APC.TPDL1) - 2*koff_CD80_PDL1*syn_T_APC.TPDL1_CD80_TPDL1	binding and unbinding of PDL1-CD80 and PDL1 in synapse
159	syn_T_APC.TPDL1 <-> syn_T_APC.TPDL1_atezo	2*kon_PDL1_atezo*(syn_T_APC.TPDL1 * V_LN.atezo/gamma_LN_atezo) - koff_PDL1_atezo*syn_T_APC.TPDL1_atezo	binding and unbinding of PDL1 to atezo on APC surface in synapse
160	syn_T_APC.TPDL1_atezo + syn_T_APC.TPDL1 <-> syn_T_APC.TPDL1_atezo_TPDL1	Chi_PDL1_atezo*kon_PDL1_atezo*(syn_T_APC.TPDL1 * syn_T_APC.TPDL1_atezo) - 2*koff_PDL1_atezo*syn_T_APC.TPDL1_atezo_TPDL1	binding and unbinding of PDL1 to PDL1-atezo on APC surface in synapse
161	V_T.Treg_CTLA4 <-> V_T.Treg_CTLA4_ipi	kon_CTLA4_ipi*(V_T.Treg_CTLA4 * V_T.ipi/gamma_C_ipi) - koff_CTLA4_ipi*V_T.Treg_CTLA4_ipi	binding and unbinding of CTLA4 to Ipi on Treg surface in Tumor
162	V_T.Treg_CTLA4_ipi + V_T.Treg_CTLA4 <-> V_T.Treg_CTLA4_ipi_CTLA4	Chi_CTLA4_ipi*kon_CTLA4_ipi*(V_T.Treg_CTLA4 * V_T.Treg_CTLA4_ipi)/A_Tcell - koff_CTLA4_ipi*V_T.Treg_CTLA4_ipi_CTLA4	binding and unbinding of CTLA4 to CTLA4-Ipi on Treg surface in Tumor
163	V_P.Treg_CTLA4 <-> V_P.Treg_CTLA4_ipi	kon_CTLA4_ipi*(V_P.Treg_CTLA4 * V_P.ipi/gamma_P_ipi) - koff_CTLA4_ipi*V_P.Treg_CTLA4_ipi	binding and unbinding of CTLA4 to Ipi on Treg surface in Peripheral compartment
164	V_P.Treg_CTLA4_ipi + V_P.Treg_CTLA4 <-> V_P.Treg_CTLA4_ipi_CTLA4	Chi_CTLA4_ipi*kon_CTLA4_ipi*(V_P.Treg_CTLA4 * V_P.Treg_CTLA4_ipi)/A_Tcell - koff_CTLA4_ipi*V_P.Treg_CTLA4_ipi_CTLA4	binding and unbinding of CTLA4 to CTLA4-Ipi on Treg surface in Peripheral compartment
165	V_T.T0 -> null	k_CTLA4_ADCC*V_T.T0*H_Treg_T	CTLA4 ADCC in the tumor compartment
166	V_P.T0 -> null	k_CTLA4_ADCC*V_P.T0*H_Treg_P	CTLA4 ADCC in the peripheral compartment
167	null -> V_T.MDSC	k_rec_MDSC*(MDSC_max*V_T-V_T.MDSC)*(CCL2/(EC50_CCL2_rec+CCL2))	MDSC recruitment into the tumor compartment
168	null -> V_T.MDSC	k_brec_MDSC*(MDSC_max*V_T-V_T.MDSC)	Baseline MDSC Migration into the tumor compartment
169	V_T.MDSC -> null	kd_MDSC*V_T.MDSC	MDSC death in the tumor compartment
170	V_T.CCL2 -> null	k_deg_CCL2*V_T.CCL2	CCL2 degradation
171	V_T.NO -> null	k_deg_NO*V_T.NO	NO degradation
172	V_T.ArgI -> null	k_deg_ArgI*V_T.ArgI	ArgI degradation
173	null -> V_T.CCL2	k_sec_CCL2*C_total*(1-V_T.ENT/(V_T.ENT+IC50_ENT_CCL2))	CCL2 secretion by MDSCs and cancer cells
174	null -> V_T.NO	k_sec_NO*V_T.MDSC*(1-V_T.ENT/(V_T.ENT+IC50_ENT_NO))	NO secretion from MDSC
175	null -> V_T.ArgI	k_sec_ArgI*V_T.MDSC*(1-V_T.ENT/(V_T.ENT+IC50_ENT_ArgI))	ArgI secretion from MDSC
176	V_C.Dose2 -> V_C.ENT_GI	k_dose2*V_C.Dose2	first-order absorption of ENT into buccal compartment
177	V_C.ENT_Buccal -> V_C.ENT	k_a1_ENT*V_C.ENT_Buccal	Buccal absorption of ENTinto central comparment
178	V_C.ENT_GI -> V_C.ENT	k_a2_ENT*V_C.ENT_GI	Gastro-intestinal absorption of ENTinto central comparment
179	V_C.ENT -> null	k_cln_ENT*V_C.ENT/(V_C.ENT+Kc_ENT)	ENT Non-linear clearance from central compartment
180	V_C.ENT <-> V_P.ENT	q_P_ENT*(V_C.ENT/gamma_C_ENT-V_P.ENT/gamma_P_ENT)	ENT diffusive transport to peripheral compartment
181	V_C.ENT <-> V_T.ENT	q_T_ENT*(V_C.ENT/gamma_C_ENT-V_T.ENT/gamma_T_ENT)	ENT diffusive transport to tumor compartment
182	V_C.ENT <-> V_LN.ENT	q_LN_ENT*(V_C.ENT/gamma_C_ENT-V_LN.ENT/gamma_LN_ENT)	ENT diffusive transport to lymph node compartment
183	V_T.ENT -> V_LN.ENT	q_LD_ENT*V_T.ENT/gamma_T_ENT	ENT convective transport from tumor to lymph node
184	V_LN.ENT -> V_C.ENT	q_LD_ENT*V_LN.ENT/gamma_LN_ENT	ENT convective transport from lymph node to central
185	V_C.ENT -> null	k_cl_ENT*V_C.ENT	Drug clearance from central compartment
186	V_1.NabP <-> V_2.NabP	Vmt/(V_1.NabP+Kt)*V_1.NabP - Vmt/(V_2.NabP+Kt)*V_2.NabP	Intercompartmental distribution of nab-paclitaxel between V1 and V2 compartment
187	V_1.NabP <-> V_3.NabP	Q2*V_1.NabP - Q2*V_3.NabP	Intercompartmental clearance of nab-paclitaxel between V1 and V3 compartment
188	V_1.NabP -> null	Vmcl/(V_1.NabP+Kcl)*V_1.NabP	Clearance of nab-paclitaxel from V1 compartment
189	V_T.C1 -> V_T.C_x	k_C_nabp*V_T.C1*(V_T.NabP/(V_T.NabP+IC50_nabp))*min(C_total,Kc_cyt)/C_total	Cancer cell death by nab-paclitaxel
190	V_T.C1 -> V_T.C2	k_C_resist*V_T.C1*H_TGF_CTL	Cancer cell resistance to nab-paclitaxel
191	V_T.C2 -> V_T.C_x	k_C_nabp*V_T.C2*(V_T.NabP/(V_T.NabP+IC50_nabp*r_resist))*min(C_total,Kc_cyt)/C_total	Resistant cancer cell death by nab-paclitaxel
192	null -> V_T.c_vas	k_c_vas*C_total	Baseline secretion/degradation of angiogenic factors
193	null -> V_T.c_vas	k_c_nabp*C_total*V_T.NabP/(V_T.NabP+IC50_nabp_vas)	Angiogenic factor release in response to nab-paclitaxel
194	V_T.c_vas -> null	k_c_deg*V_T.c_vas	Baseline secretion/degradation of angiogenic factors
195	null -> V_T.K	k_K_g*C_total*V_T.c_vas/(V_T.c_vas+IC50_vas)	Resistant cancer cell death by nab-paclitaxel
196	V_T.K -> null	k_K_d*V_T.K*(nthroot(C_total/cell*2.57e-6,3))^2	Resistant cancer cell death by nab-paclitaxel
197	V_T.K -> null	k_endo_nabp*V_T.K*V_T.NabP	Endothelial cell death by nab-paclitaxel
198	V_LN.nT0 -> null	k_Th_act*H_APCh*H_P1*V_LN.nT0	Naive T cell activation
199	null -> V_LN.aTh	k_Th_act*H_APCh*H_P1*V_LN.nT0*n_T1_clones	Naive T cell activation
200	V_LN.aTh -> null	(k_T0_pro/N_aTh)*V_LN.aTh	aTh cell proliferation
201	null -> V_LN.Th	(k_T0_pro/N_aTh)*2^N_aTh*V_LN.aTh	aTh cell proliferation
202	V_T.Th -> V_T.T0	k_reg*V_T.Th*ArgI/(EC50_ArgI_Treg+ArgI)*H_TGF_reg	Differentiation between Treg and Th Cells
203	V_C.Th -> null	k_T0_death*V_C.Th	T cell death in the central compartment
204	V_P.Th -> null	k_T0_death*V_P.Th	T cell death in the peripheral compartment
205	V_LN.Th -> null	k_T0_death*V_LN.Th	T cell death in the lymph node compartment
206	V_T.Th -> V_T.Th_exh	k_T0_death*V_T.Th	T cell death in the tumor compartment
207	V_C.Th -> V_P.Th	q_T0_P_in*V_C.Th	T cell transport into the peripheral compartment
208	V_P.Th -> V_C.Th	q_T0_P_out*V_P.Th	T cell transport out of the peripheral compartment
209	V_C.Th -> V_T.Th	q_T0_T_in*V_T*V_C.Th*(C_total^2/(C_total^2+Kc_rec))	T cell transport into the tumor compartment
210	V_LN.Th -> V_C.Th	q_T0_LN_out*V_LN.Th	T cell transport out of the lymph node compartment
211	null -> V_LN.IL2	k_IL2_sec*V_LN.aTh	IL2 secretion from activated T cells
212	null -> V_T.TGF	k_TGF_deg*(TGFbase - V_T.TGF)*V_T	TGFb secretion by triple-negative breast cancer cells
213	null -> V_T.TGF	k_TGF_Tsec*V_T.T0	TGF secretion from activated T cells in tumor
214	null -> V_T.IFNg	k_IFNg_sec*V_T.Th	IFNg secretion from T helper cells in tumor
215	V_T.IFNg -> null	k_IFNg_deg*V_T.IFNg	IFNg degradtion in tumor

## Sheet: Table S6. Rules
ID	Rule	RuleType
1	V_T = ((C_x+C_total)*vol_cell+(T1_exh+Th_exh+T_total+V_T.Th)*vol_Tcell)/Ve_T	repeatedAssignment
2	C_total = 0*cell+C1+C2	repeatedAssignment
3	T_total = 0*cell+V_T.T0+V_T.T1+V_T.Th	repeatedAssignment
4	T_total_LN = 0*cell+V_LN.T0+V_LN.T1+V_LN.Th	repeatedAssignment
5	R_Tcell = 0*cell/day+(k_T1_death+k_C1_therapy)*V_T.C1+k_C_T1*V_T.C1*V_T.T1/(1.2*V_T.C1+V_T.T1+cell)*V_T.T1/(V_T.T1+11*Tregs_+cell)*(1-H_TGF_CTL)*(1-H_PD1_C1)*(1-H_MDSC_C1)+(k_T1_death+k_C2_therapy)*V_T.C2+k_C_T1*V_T.C2*V_T.T1/(1.2*V_T.C2+V_T.T1+cell)*V_T.T1/(V_T.T1+11*Tregs_+cell)*(1-H_TGF_CTL)*(1-H_PD1_C1)*(1-H_MDSC_C1)	repeatedAssignment
6	Tregs_ = V_T.T0	repeatedAssignment
7	N_aT = N0 + N_costim*H_CD28_APC + N_IL2_CD8*V_LN.IL2/(IL2_50+V_LN.IL2)	repeatedAssignment
8	N_aT0 = N0 + N_costim*H_CD28_APC + N_IL2_CD4*V_LN.IL2/(IL2_50_Treg+V_LN.IL2)	repeatedAssignment
9	H_APC = n_sites_APC*V_LN.mAPC/(n_sites_APC*V_LN.mAPC+V_LN.nT0*n_T0_clones+cell)	repeatedAssignment
10	H_mAPC = n_sites_APC*V_LN.mAPC/(n_sites_APC*V_LN.mAPC+V_LN.nT1*n_T1_clones+cell)	repeatedAssignment
11	H_APCh = n_sites_APC*V_LN.mAPC/(n_sites_APC*V_LN.mAPC+V_LN.nT0*n_T1_clones+cell)	repeatedAssignment
12	pTCR_p0_MHC_tot = k_M1p0_TCR_off/(k_M1p0_TCR_off+phi_M1p0_TCR)*(k_M1p0_TCR_p/(k_M1p0_TCR_off+k_M1p0_TCR_p))^N_M1p0_TCR*(0.5*(A_s.M1p0/n_T0_clones+TCR_p0_tot+k_M1p0_TCR_off/k_M1p0_TCR_on-TCR_p0_tot*sqrt(((A_s.M1p0/n_T0_clones+TCR_p0_tot+k_M1p0_TCR_off/k_M1p0_TCR_on)/TCR_p0_tot)^2-4*A_s.M1p0/n_T0_clones/TCR_p0_tot)))	repeatedAssignment
13	H_P0 = pTCR_p0_MHC_tot/(pTCR_p0_MHC_tot+p0_50)	repeatedAssignment
14	pTCR_p1_MHC_tot = k_M1p1_TCR_off/(k_M1p1_TCR_off+phi_M1p1_TCR)*(k_M1p1_TCR_p/(k_M1p1_TCR_off+k_M1p1_TCR_p))^N_M1p1_TCR*(0.5*(A_s.M1p1/n_T1_clones+TCR_p1_tot+k_M1p1_TCR_off/k_M1p1_TCR_on-TCR_p1_tot*sqrt(((A_s.M1p1/n_T1_clones+TCR_p1_tot+k_M1p1_TCR_off/k_M1p1_TCR_on)/TCR_p1_tot)^2-4*A_s.M1p1/n_T1_clones/TCR_p1_tot)))	repeatedAssignment
15	H_P1 = pTCR_p1_MHC_tot/(pTCR_p1_MHC_tot+p1_50)	repeatedAssignment
16	syn_T_C1.PD1 = T_PD1_total /A_Tcell	initialAssignment
17	syn_T_C1.CD28 = T_CD28_total /A_Tcell	initialAssignment
18	syn_T_C1.CTLA4 = T_CTLA4_syn /A_Tcell	initialAssignment
19	syn_T_C1.TPDL1 = T_PDL1_total /A_Tcell	initialAssignment
20	syn_T_C1.PDL1 = C1_PDL1_base /A_cell	initialAssignment
21	syn_T_C1.PDL2 = C1_PDL1_base*r_PDL2C1 /A_cell	initialAssignment
22	syn_T_C1.PDL1_total = syn_T_C1.PDL1+syn_T_C1.PD1_PDL1+syn_T_C1.PDL1_atezo+2*syn_T_C1.PDL1_atezo_PDL1	repeatedAssignment
23	syn_T_C1.PDL2_total = syn_T_C1.PD1_PDL2+syn_T_C1.PDL2	repeatedAssignment
24	syn_T_C1.CD80 = C1_CD80_total /A_cell	initialAssignment
25	syn_T_C1.CD86 = C1_CD86_total /A_cell	initialAssignment
26	H_PD1_C1 = ((syn_T_C1.PD1_PDL1+syn_T_C1.PD1_PDL2)/PD1_50)^n_PD1/(((syn_T_C1.PD1_PDL1+syn_T_C1.PD1_PDL2)/PD1_50)^n_PD1 + 1)	repeatedAssignment
27	H_CD28_C1 = ((syn_T_C1.CD28_CD80 + syn_T_C1.CD28_CD86 + 2*syn_T_C1.CD28_CD80_CD28)/CD28_CD8X_50)^n_CD28_CD8X/(((syn_T_C1.CD28_CD80 + syn_T_C1.CD28_CD86 + 2*syn_T_C1.CD28_CD80_CD28)/CD28_CD8X_50)^n_CD28_CD8X + 1)	repeatedAssignment
28	syn_T_APC.PD1 = T_PD1_total /A_Tcell	initialAssignment
29	syn_T_APC.CD28 = T_CD28_total /A_Tcell	initialAssignment
30	syn_T_APC.CTLA4 = T_CTLA4_syn /A_Tcell	initialAssignment
31	syn_T_APC.TPDL1 = T_PDL1_total /A_Tcell	initialAssignment
32	syn_T_APC.PDL1 = APC_PDL1_base /A_APC	initialAssignment
33	syn_T_APC.PDL2 = APC_PDL1_base*r_PDL2APC /A_APC	initialAssignment
34	syn_T_APC.PDL1_total = syn_T_APC.PDL1+syn_T_APC.PD1_PDL1+syn_T_APC.PDL1_atezo+2*syn_T_APC.PDL1_atezo_PDL1	repeatedAssignment
35	syn_T_APC.PDL2_total = syn_T_APC.PD1_PDL2+syn_T_APC.PDL2	repeatedAssignment
36	syn_T_APC.CD80 = APC_CD80_total /A_APC	initialAssignment
37	syn_T_APC.CD86 = APC_CD86_total /A_APC	initialAssignment
38	H_PD1_APC = ((syn_T_APC.PD1_PDL1+syn_T_APC.PD1_PDL2)/PD1_50)^n_PD1/(((syn_T_APC.PD1_PDL1+syn_T_APC.PD1_PDL2)/PD1_50)^n_PD1 + 1)	repeatedAssignment
39	H_CD28_APC = ((syn_T_APC.CD28_CD80 + syn_T_APC.CD28_CD86 + 2*syn_T_APC.CD28_CD80_CD28)/CD28_CD8X_50)^n_CD28_CD8X/(((syn_T_APC.CD28_CD80 + syn_T_APC.CD28_CD86 + 2*syn_T_APC.CD28_CD80_CD28)/CD28_CD8X_50)^n_CD28_CD8X + 1)	repeatedAssignment
40	V_T.Treg_CTLA4 = Treg_CTLA4_tot	initialAssignment
41	V_P.Treg_CTLA4 = Treg_CTLA4_tot	initialAssignment
42	H_Treg_T = ((V_T.Treg_CTLA4_ipi+2*V_T.Treg_CTLA4_ipi_CTLA4)/Treg_CTLA4_50)^n_Treg_CTLA4/(((V_T.Treg_CTLA4_ipi+2*V_T.Treg_CTLA4_ipi_CTLA4)/Treg_CTLA4_50)^n_Treg_CTLA4 + 1)	repeatedAssignment
43	H_Treg_P = ((V_P.Treg_CTLA4_ipi+2*V_P.Treg_CTLA4_ipi_CTLA4)/Treg_CTLA4_50)^n_Treg_CTLA4/(((V_P.Treg_CTLA4_ipi+2*V_P.Treg_CTLA4_ipi_CTLA4)/Treg_CTLA4_50)^n_Treg_CTLA4 + 1)	repeatedAssignment
44	H_MDSC_C1 = 1-(IC50_NO_CTL/(IC50_NO_CTL+NO))*(1-ArgI/(IC50_ArgI_CTL+ArgI)*(IC50_ENT_ArgI/(V_T.ENT+IC50_ENT_ArgI)))	repeatedAssignment
45	H_ENT_C1 = V_T.ENT/(V_T.ENT+IC50_ENT_C)	repeatedAssignment
46	V_T.NabP = r_nabp*V_1.NabP/MW_nabp	repeatedAssignment
47	k_C1_therapy = k_C_nabp*(V_T.NabP/(V_T.NabP+IC50_nabp))*min(C_total,Kc_cyt)/C_total	repeatedAssignment
48	k_C2_therapy = k_C_nabp*(V_T.NabP/(V_T.NabP+IC50_nabp*r_resist))*min(C_total,Kc_cyt)/C_total	repeatedAssignment
49	k_C2_growth = k_C1_growth	repeatedAssignment
50	k_C2_death = k_C1_death	repeatedAssignment
51	C_max = V_T.K	repeatedAssignment
52	H_TGF_reg = V_T.TGF/(V_T.TGF+TGF_50_reg)	repeatedAssignment
53	H_TGF_CTL = V_T.TGF/(V_T.TGF+TGF_50_ctl)	repeatedAssignment
54	N_aTh = N0 + N_costim*H_CD28_APC + N_IL2_CD4*V_LN.IL2/(IL2_50+V_LN.IL2)	repeatedAssignment
